# Supplementary material for: Circular Helix-Like Curve: An Effective Tool of Biological Sequence Analysis and Comparison
Source: Hindawi journal article supplement (doi:10.1155/2016/3262813), 2016-01-01
Supplement: f1 [file 3262813.f1.pdf]

## Supplementary materials

Table 1 The complete coding sequences of  $\beta$ -globin genes of 11 species

| Species    | Complete Coding sequence                                                                                                                                                                                                                                                                                                                                                                                                                                                                   |
|------------|--------------------------------------------------------------------------------------------------------------------------------------------------------------------------------------------------------------------------------------------------------------------------------------------------------------------------------------------------------------------------------------------------------------------------------------------------------------------------------------------|
| Human      | ATGGTGCACCTGACTCCTGAGGAGAAGTCTGCCGTTACTGCCCTGTGGGGCAAGGTGAAC<br>GTGGATGAAGTTGGTGGTGAGGCCCTGGGCAGGCTGCTGGTGGTCTACCCTTGGACCCAG<br>AGGTTCTTTGAGTCCTTTGGGGATCTGTCCACTCCTGATGCTGTTATGGGCAACCCTAAGGT<br>GAAGGCTCATGGCAAGAAAGTGCTCGGTGCCTTTAGTGATGGCCTGGCTCACCTGGACAAC<br>CTCAAGGGCACCTTTGCCACACTGAGTGAGCTGCACTGTGACAAGCTGCACGTGGATCCT<br>GAGAACTTCAGGCTCCTGGGCAACGTGCTGGTCTGTGTGCTGGCCCATCACTTTGGCAAAG<br>AATTCACCCACCAAGTGCAGGCTGCCTATCAGAAAGTGGTGGCTGGTGTGGCTAATGCCCT<br>GGCCACAAGTATCACTAA    |
| Chimpanzee | ATGGTGCACCTGACTCCTGAGGAGAAGTCTGCCGTTACTGCCCTGTGGGGCAAGGTGAAC<br>GTGGATGAAGTTGGTGGTGAGGCCCTGGGCAGGTTGGTATCAAGGCTGCTGGTGGTCTACC<br>CTTGGACCCAGAGGTTCTTTGAGTCCTTTGGGGATCTGTCCACTCCTGATGCTGTTATGGGC<br>AACCTAAGGTGAAGGCTCATGGCAAGAAAGTGCTCGGTGCCTTTAGTGATGGCCTGGCTC<br>ACCTGGACAACCTCAAGGGCACCTTTGCCACACTGAGTGAGCTGCACTGTGACAAGCTGC<br>ACGTGGATCCTGAGAACTTCAGGCTCCTGGGCAACGTGCTGGTCTGTGTGCTGGCCCATCA<br>CTTTGGCAAAG                                                                            |
| Gorilla    | ATGGTGCACCTGACTCCTGAGGAGAAGTCTGCCGTTACTGCCCTGTGGGGCAAGGTGAAC<br>GTGGATGAAGTTGGTGGTGAGGCCCTGGGCAGGCTGCTGGTGGTCTACCCTTGGACCCAG<br>AGGTTCTTTGAGTCCTTTGGGGATCTGTCCACTCCTGATGCTGTTATGGGCAACCCTAAGGT<br>GAAGGCTCATGGCAAGAAAGTGCTCGGTGCCTTTAGTGATGGCCTGGCTCACCTGGACAAC<br>CTCAAGGGCACCTTTGCCACACTGAGTGAGCTGCACTGTGACAAGCTGCACGTGGATCCT<br>GAGAACTTCAAGCTCCTGGGCAATGTGCTGGTCTGTGTGCTGGCCCATCACTTTGGCAAAG                                                                                           |
| Lemur      | ATGACTTTGCTGAGTGCTGAGGAGAATGCTCATGTCACCTCTCTGTGGGGCAAGGTGGATG<br>TAGAGAAAGTTGGTGGCGAGGCCCTTGGGCAGGCTGCTGGTCGTCTACCCATGGACCCAGA<br>GGTTCCTTCGAGTCCTTTGGGGACCTGTCCTCTCCTTCTGCTGTTATGGGGAACCCTAAGGTG<br>AAGGCCCATGGCAAGAAGGTGCTGAGTGCCTTTAGTGAAGGTCTGCATCACCTGGACAAC<br>CTCAAGGGCACCTTTGCTCAACTGAGTGAGCTGCACTGTGACAAGTTGCACGTGGATCCTC<br>AGAACTTCACTCTCCTGGGCAACGTGCTGGTGGTTGTGCTGGCTGAACACTTTGGCAATGC<br>ATTCAGCCCGGCGGTGCAGGCTGCCTTTCAGAAGGTGGTGGCTGGTGTGGCCAATGCTCTG<br>GCTCACAAGTACCACTGA |
| Rat        | ATGGTGCACCTAACTGATGCTGAGAAGGCTACTGTTAGTGGCCTGTGGGGAAAGGTGAATG<br>CTGATAATGTTGGCGCTGAGGCCCTGGGCAGGCTGCTGGTTGTCTACCCTTGGACCCAGAG<br>GTACTTTTCTAAATTTGGGGACCTGTCCTCTGCCTCTGCTATCATGGGTAACCCCCAGGTGA<br>AGGCCCATGGCAAGAAGGTGATAAATGCCTTCAATGATGGCCTGAAACACTTGGACAACCT<br>CAAGGGCACCTTTGCTCATCTGAGTGAACTCCACTGTGACAAGCTGCATGTGGATCCTGAG<br>AACTTCAGGCTCCTGGGCAATATGATTGTGATTGTGTTGGGCCACCACTGGGCAAGGAAT<br>TCACCCCTGTGCACAGGCTGCCTTCCAGAAGGTGGTGGCTGGAGTGGCCAGTGCCTGG<br>CTCACAAGTACCACTAA      |
| Mouse      | ATGGTGCACCTGACTGATGCTGAGAAGTCTGCTGTCTCTTGCCTGTGGGGCAAGGTGAACC<br>CCGATGAAGTTGGTGGTGAGGCCCTGGGCAGGCTGCTGGTTGTCTACCCTTGGACCCAGCG<br>GTACTTTGATAGCTTTGGAGACCTATCCTCTGCCTCTGCTATCATGGGTAATCCCAAGGTGA<br>AGGCCCATGGCAAAAAGGTGATAACTGCCTTTAACGAGGGCCTGAAAAACCTGGACAACC                                                                                                                                                                                                                           |

---

|         |                                                                                                                                                                                                                                                                                                                                                                                                                                                                                         |
|---------|-----------------------------------------------------------------------------------------------------------------------------------------------------------------------------------------------------------------------------------------------------------------------------------------------------------------------------------------------------------------------------------------------------------------------------------------------------------------------------------------|
|         | TCAAGGGCACCTTTGCCAGCCTCAGTGAGCTCCACTGTGACAAGCTGCATGTGGATCCTGA<br>GAACTTCAGGCTCCTAGGCAATGCGATCGTGATTGTGCTGGGCCACCACCTGGGCAAGGAT<br>TTCACCCCTGCTGCACAGGCTGCCTTCCAGAAGGTGGTGGCTGGAGTGGCCACTGCCCTG<br>GCTCACAAGTACCACTAA                                                                                                                                                                                                                                                                    |
| Goat    | ATGCTGACTGCTGAGGAGAAGGCTGCCGTCACCGGCTTCTGGGGCAAGGTGAAAGTGGAT<br>GAAGTTGGTGCTGAGGCCCTGGGCAGGCTGCTGGTTGTCTACCCCTGGACTCAGAGGTTCT<br>TTGAGCACTTTGGGGACTTGTCTCTGCTGATGCTGTTATGAACAATGCTAAGGTGAAGGC<br>CCATGGCAAGAAGGTGCTAGACTCCTTTAGTAACGGCATGAAGCATCTTGACGACCTCAAG<br>GGCACCTTTGCTCAGCTGAGTGAGCTGCACTGTGATAAGCTGCACGTGGATCCTGAGAACT<br>TCAAGCTCCTGGGCAACGTGCTGGTGGTTGTGCTGGCTCGCCACCATGGCAGTGAATTCAC<br>CCCGCTGCTGCAGGCTGAGTTTCAGAAGGTGGTGGCTGGTGTGGCCAATGCCCTGGCCCCAC<br>AGATATCACTAA      |
| Bovine  | ATGCTGACTGCTGAGGAGAAGGCTGCCGTCACCGCCTTTTGGGGCAAGGTGAAAGTGGAT<br>GAAGTTGGTGGTGAGGCCCTGGGCAGGCTGCTGGTTGTCTACCCCTGGACTCAGAGGTTCT<br>TTGAGTCCTTTGGGGACTTGTCCACTGCTGATGCTGTTATGAACAACCCTAAGGTGAAGGC<br>CCATGGCAAGAAGGTGCTAGATTCCTTTAGTAATGGCATGAAGCATCTCGATGACCTCAAG<br>GGCACCTTTGCTGCGCTGAGTGAGCTGCACTGTGATAAGCTGCATGTGGATCCTGAGAACT<br>TCAAGCTCCTGGGCAACGTGCTAGTGGTTGTGCTGGCTCGCAATTTTGGCAAGGAATTCAC<br>CCCGGTGCTGCAGGCTGACTTTTCAGAAGGTGGTGGCTGGTGTGGCCAATGCCCTGGCCCCA<br>CAGATATCATTA     |
| Rabbit  | ATGGTGACTGTCCAGTGAGGAGAAGTCTGCGGTCACTGCCCTGTGGGGCAAGGTGAAT<br>GTGGAAGAAGTTGGTGGTGAGGCCCTGGGCAGGCTGCTGGTTGTCTACCCATGGACCCAG<br>AGGTTCTTCGAGTCCTTTGGGGACCTGTCTCTGCAAATGCTGTTATGAACAATCCTAAGGT<br>GAAGGCTCATGGCAAGAAGGTGCTGGCTGCCTTCAGTGAGGGTCTGAGTCACCTGGACAA<br>CCTCAAAGGCACCTTTGCTAAGCTGAGTGAAGTGCCTGTGACAAGCTGCACGTGGATCCT<br>GAGAACTTCAGGCTCCTGGGCAACGTGCTGGTTATTGTGCTGTCTCATCATTTTGGCAAAG<br>AATTCACCTCCTCAGGTGCAGGCTGCCTATCAGAAGGTGGTGGCTGGTGTGGCCAATGCCCT<br>GGCTCACAAATACCACTGA   |
| Opossum | ATGGTGCACTTGACTTCTGAGGAGAAGAACTGCATCACTACCATCTGGTCTAAGGTGCAGG<br>TTGACCAGACTGGTGGTGAGGCCCTTGGCAGGATGCTCGTTGTCTACCCCTGGACCCAG<br>GTTTTTTGGGAGCTTTGGTGATCTGTCTCTCCTGGCGCTGTCATGTCAAATTCTAAGGTTT<br>AAGCCCATGGTGCTAAGGTGTTGACCTCCTTCGGTGAAGCAGTCAAGCATTTGGACAACCT<br>GAAGGGTACTTATGCCAAGTTGAGTGAGCTCCACTGTGACAAGCTGCATGTGGACCCTGAG<br>AACTTCAAGATGCTGGGGAATATCATTGTGATCTGCCTGGCTGAGCACTTTGGCAAGGATTT<br>TACTCCTGAATGTCAGGTTGCTTGGCAGAAGCTCGTGGCTGGAGTTGCCCATGCCCTGGCC<br>CACAAGTACCACTAA   |
| Gallus  | ATGGTGCACTGGACTGCTGAGGAGAAGCAGCTCATCACCGGCCTCTGGGGCAAGGTCAAT<br>GTGGCCGAATGTGGGGCCGAAGCCCTGGCCAGGCTGCTGATCGTCTACCCCTGGACCCAG<br>AGGTTCTTTGCGTCCTTTGGGAACCTCTCCAGCCCCACTGCCATCCTTGGCAACCCCATGGT<br>CCGCGCCACGGAAGAAAGTGCTCACCTCCTTTGGGGATGCTGTGAAGAACCTGGACAA<br>CATCAAGAACACCTTCTCCCAACTGTCCGAAGTGCATTGTGACAAGCTGCATGTGGACCCC<br>GAGAACTTCAGGCTCCTGGGTGACATCCTCATCATTTGCTCTGGCCGCCCACTTCAGCAAGG<br>ACTTCACTCCTGAATGCCAGGCTGCCTGGCAGAAGCTGGTCCGCGTGGTGGCCCATGCCCT<br>GGCTCGCAAGTACCACTAA |

---

Table 2 74 sequences of 16S ribosomal RNA

| No. | Accession no. | Definition                                                                         | Organism                 | Length |
|-----|---------------|------------------------------------------------------------------------------------|--------------------------|--------|
| 1   | M63246        | Buchneraaphidicola (primary endosymbiontof Schizaphis graminum) 16SribosomalRNA    | Buchnera aphidicola      | 1510   |
| 2   | M63247        | Buchneraaphidicola (primary endosymbiontof Rhopalosiphum maidis) 16SribosomalRNA   | Buchnera aphidicola      | 1507   |
| 3   | M63248        | Buchneraaphidicola (primary endosymbiontof Rhopalosiphum padi) 16SribosomalRNA     | Buchnera aphidicola      | 1507   |
| 4   | M63249        | Buchneraaphidicola (primary endosymbiontof Myzus persicae) 16SribosomalRNA         | Buchnera aphidicola      | 1504   |
| 5   | M63250        | Buchneraaphidicola (primary endosymbiontof Uroleucon sonchi) 16SribosomalRNA       | Buchnera aphidicola      | 1507   |
| 6   | M63251        | Buchneraaphidicola (primary endosymbiontof Diuraphisnoxia) 16SribosomalRNA         | Buchnera aphidicola      | 1499   |
| 7   | M63252        | Buchneraaphidicola (primary endosymbiontof Chaitophorus viminalis) 16SribosomalRNA | Buchnera aphidicola      | 1519   |
| 8   | M63253        | Buchneraaphidicola (primary endosymbiontof Mindarus victoria) 16SribosomalRNA      | Buchnera aphidicola      | 1507   |
| 9   | M63254        | Buchneraaphidicola (primary endosymbiontof Pemphigusbetae) 16SribosomalRNA         | Buchnera aphidicola      | 1517   |
| 10  | M63255        | Buchneraaphidicola (primary endosymbiontof Melaphis rhois) 16SribosomalRNA         | Buchnera aphidicola      | 1520   |
| 11  | D89791        | Coxiella burnetii 16SribosomalRNA                                                  | Coxiella burnetii        | 1455   |
| 12  | D89792        | Coxiella burnetii 16SribosomalRNA                                                  | Coxiella burnetii        | 1455   |
| 13  | D89795        | Coxiella burnetii 16SribosomalRNA                                                  | Coxiella burnetii        | 1455   |
| 14  | D89796        | Coxiella burnetii 16SribosomalRNA                                                  | Coxiella burnetii        | 1454   |
| 15  | D89797        | Coxiella burnetii 16SribosomalRNA                                                  | Coxiella burnetii        | 1454   |
| 16  | D89798        | Coxiella burnetii 16SribosomalRNA                                                  | Coxiella burnetii        | 1456   |
| 17  | D89799        | Coxiella burnetii 16SribosomalRNA                                                  | Coxiella burnetii        | 1454   |
| 18  | D89800        | Coxiella burnetii 16SribosomalRNA                                                  | Coxiella burnetii        | 1454   |
| 19  | M21291        | Coxiella burnetii 16SribosomalRNA                                                  | Coxiella burnetii        | 1484   |
| 20  | M62682        | Fibrobacter succinogenes (strain REH9-1)16SribosomalRNA                            | Fibrobacter succinogenes | 1499   |
| 21  | M62683        | Fibrobacter succinogenes succinogenes (strainA3C)16SribosomalRNA                   | Fibrobacter succinogenes | 1505   |
| 22  | M62684        | Fibrobacter succinogenes succinogenes (strainB1)16SribosomalRNA                    | Fibrobacter succinogenes | 1501   |
| 23  | M62685        | Fibrobacter succinogenes succinogenes (strainBL2)16SribosomalRNA                   | Fibrobacter succinogenes | 1501   |
| 24  | M62688        | Fibrobacter succinogenes (strain GC5)16SribosomalRNA                               | Fibrobacter succinogenes | 1499   |
| 25  | M62689        | Fibrobacter succinogenes (strain HM2)16SribosomalRNA                               | Fibrobacter succinogenes | 1499   |
| 26  | M62692        | Fibrobacter succinogenes (strain MB4)16SribosomalRNA                               | Fibrobacter succinogenes | 1499   |
| 27  | M62693        | Fibrobacter succinogenes (strain MC1)16SribosomalRNA                               | Fibrobacter succinogenes | 1499   |
| 28  | M62694        | Fibrobacter succinogenes (strain MM4)16SribosomalRNA                               | Fibrobacter succinogenes | 1499   |
| 29  | AJ871855      | Klebsiella oxytoca partial 16SrRNAgene,strainSB9                                   | Klebsiella oxytoca       | 1454   |
| 30  | AJ871856      | Klebsiella oxytoca partial 16SrRNAgene,strainSB71                                  | Klebsiella oxytoca       | 1454   |
| 31  | AJ871857      | Klebsiella oxytoca partial 16SrRNAgene,strainSB136                                 | Klebsiella oxytoca       | 1454   |
| 32  | AJ871858      | Klebsiella oxytoca partial 16SrRNAgene,typestrainSB175T                            | Klebsiella oxytoca       | 1454   |
| 33  | AJ871859      | Klebsiella oxytoca partial 16SrRNAgene,strainSB2908                                | Klebsiella oxytoca       | 1454   |
| 34  | AJ871860      | Klebsiella oxytoca partial 16SrRNAgene,strainSB2942                                | Klebsiella oxytoca       | 1454   |
| 35  | AJ871861      | Klebsiella oxytoca partial 16SrRNAgene,strainSB73                                  | Klebsiella oxytoca       | 1454   |
| 36  | AJ871862      | Klebsiella oxytoca partial 16SrRNAgene,strainSB3037                                | Klebsiella oxytoca       | 1454   |
| 37  | AJ871863      | Klebsiella oxytoca partial 16SrRNAgene,strainSB3051                                | Klebsiella oxytoca       | 1454   |
| 38  | L33687        | Azoarcusdenitrificans Td-1 16SribosomalRNAgene,completesequene                     | Azoarcus tolulyticus     | 1458   |
| 39  | L33688        | Azoarcusdenitrificans Td-1516SribosomalRNAgene,completesequene                     | Azoarcus tolulyticus     | 1457   |
| 40  | L33689        | Azoarcusdenitrificans Td-1716SribosomalRNAgene,completesequene                     | Azoarcus tolulyticus     | 1458   |
| 41  | L33690        | Azoarcusdenitrificans Td-1916SribosomalRNAgene,completesequene                     | Azoarcus tolulyticus     | 1458   |
| 42  | L33691        | Azoarcusdenitrificans Td-2 16SribosomalRNAgene,completesequene                     | Azoarcus tolulyticus     | 1458   |
| 43  | L33692        | Azoarcusdenitrificans Td-2116SribosomalRNAgene,completesequene                     | Azoarcus tolulyticus     | 1457   |
| 44  | L33693        | Azoarcusdenitrificans Td-3 16SribosomalRNAgene,completesequene                     | Azoarcus tolulyticus     | 1458   |
| 45  | L33694        | Azoarcusdenitrificans Tol-416SribosomalRNAgene,completesequene                     | Azoarcus tolulyticus     | 1458   |
| 46  | M59293        | Borrelia burgdorferi small subunitribosomalRNAsenequence                           | Borrelia burgdorferi     | 1480   |
| 47  | M60967        | Borrelia burgdorferi 16SribosomalRNA                                               | Borrelia burgdorferi     | 1483   |
| 48  | M60969        | Borrelia burgdorferi 16SribosomalRNA                                               | Borrelia burgdorferi     | 1476   |
| 49  | M64309        | Borrelia burgdorferi 16SribosomalRNA                                               | Borrelia burgdorferi     | 1481   |
| 50  | M64310        | Borrelia burgdorferi 16SribosomalRNA                                               | Borrelia burgdorferi     | 1480   |
| 51  | M64311        | Borrelia burgdorferi 16SribosomalRNA                                               | Borrelia burgdorferi     | 1486   |
| 52  | M84815        | Borrelia burgdorferi 16SribosomalRNA                                               | Borrelia burgdorferi     | 1476   |
| 53  | M88140        | Helicobactersp.(strainB12ASeymour)partial16SribosomalRNA                           | Helicobacter sp.         | 1446   |
| 54  | M88141        | Helicobactersp.(strainB13ASeymour)partial16SribosomalRNA                           | Helicobacter sp.         | 1446   |
| 55  | M88142        | Helicobactersp.(strainB15ASeymour)partial16SribosomalRNA                           | Helicobacter sp.         | 1446   |
| 56  | M88145        | Helicobactersp.(strainB7BSeymour)partial16SribosomalRNA                            | Helicobacter sp.         | 1446   |
| 57  | M88146        | Helicobactersp.(strainB8ASeymour)partial16SribosomalRNA                            | Helicobacter sp.         | 1446   |

|    |          |                                                                             |                                       |      |
|----|----------|-----------------------------------------------------------------------------|---------------------------------------|------|
| 58 | M88153   | Helicobactersp.(strain91-269-21Fox)partial16SribosomalRNA                   | Helicobacter sp.                      | 1442 |
| 59 | M88155   | Helicobactersp.(strainM17Seymour)partial16SribosomalRNA                     | Helicobacter sp.                      | 1446 |
| 60 | M75035   | Actinobacillus actinomycetemcomitans16SsmallsubunitribosomalRNAgenesequence | Aggregatibacter actinomycetemcomitans | 1482 |
| 61 | M75036   | Actinobacillus actinomycetemcomitans16SsmallsubunitribosomalRNAgenesequence | Aggregatibacter actinomycetemcomitans | 1479 |
| 62 | M75037   | Actinobacillus actinomycetemcomitans16SsmallsubunitribosomalRNAgenesequence | Aggregatibacter actinomycetemcomitans | 1485 |
| 63 | M75038   | Actinobacillus actinomycetemcomitans16SsmallsubunitribosomalRNAgenesequence | Aggregatibacter actinomycetemcomitans | 1480 |
| 64 | M75039   | Actinobacillus actinomycetemcomitans16SsmallsubunitribosomalRNAgenesequence | Aggregatibacter actinomycetemcomitans | 1484 |
| 65 | AF183402 | Prevotellatannerae strain 131-9-116SribosomalRNA,completesequences          | Alloprevotella tannerae               | 1453 |
| 66 | AF183403 | Prevotellatannerae strain 29-116SribosomalRNA,completesequences             | Alloprevotella tannerae               | 1453 |
| 67 | AF183404 | Prevotellatannerae strain 83-10-216SribosomalRNA,completesequences          | Alloprevotella tannerae               | 1453 |
| 68 | AF183405 | Prevotellatannerae strain 89-9-116SribosomalRNA,completesequences           | Alloprevotella tannerae               | 1453 |
| 69 | AF183406 | Prevotellatannerae strain 93-1-216SribosomalRNA,completesequences           | Alloprevotella tannerae               | 1453 |
| 70 | AB020727 | Clostridium scindens16SrRNA,partialsequence,strain:JCM10418                 | Clostridium scindens                  | 1453 |
| 71 | AB020728 | Clostridium scindens16SrRNA,partialsequence,strain:JCM10419Y-1113           | Clostridium scindens                  | 1453 |
| 72 | AB020730 | Clostridium scindens16SrRNA,partialsequence,strain:JCM10421I-10             | Clostridium scindens                  | 1459 |
| 73 | AB020806 | Clostridium scindens16SrRNA,partialsequence,strain:JCM1042336S              | Clostridium scindens                  | 1439 |
| 74 | AB020883 | Clostridium scindens16SrRNA,partialsequence,strain:JCM6567                  | Clostridium scindens                  | 1453 |

Table 3 48 Hepatitis E viruses

| No. | Strain name  | Accession no. | Length | Genotype | Country                |
|-----|--------------|---------------|--------|----------|------------------------|
| 1   | B1(Bur-82)   | M73218        | 7207   | I        | Burma(Rangoon)         |
| 2   | B2(Bur-86)   | D10330        | 7194   | I        | Burma(Rangoon)         |
| 3   | I2(Mad-93)   | X99447        | 7194   | I        | India(Madras)          |
| 4   | I3           | AF076239      | 7194   | I        | India(Hyderabad)       |
| 5   | NP1(TK15/92) | AF051830      | 7199   | I        | Nepal(Kathamandu)      |
| 6   | P2(Abb-2B)   | AF185822      | 7143   | I        | Pakistan(Abbotabad)    |
| 7   | Yam-67       | AF459438      | 7206   | I        | India(YamunaNagar)     |
| 8   | C1(CHT-88)   | D11092        | 7207   | I        | China(Xinjiang,Hetian) |
| 9   | C2(KS2-87)   | L25595        | 7221   | I        | China(Xinjiang,Kashi)  |
| 10  | C3(CHT-87)   | L08816        | 7176   | I        | China(Xinjiang,Hetian) |
| 11  | C4(Uigh179)  | D11093        | 7194   | I        | China(Xinjiang,Uighur) |
| 12  | China hebei  | M94177        | 7200   | I        | China(Hebei)           |
| 13  | P1(Sar-55)   | M80581        | 7138   | I        | Pakistan(Rangoon)      |
| 14  | I1(FHF)      | X98292        | 7202   | I        | India                  |
| 15  | Morocco      | AY230202      | 7212   | I        | Morocco                |
| 16  | T3           | AY204877      | 7170   | I        | Chad                   |
| 17  | M1           | M74506        | 7180   | II       | Mexico(Telixtac)       |
| 18  | HE-JA10      | AB089824      | 7262   | III      | Japan(Tokyo)           |
| 19  | JKN-Sap      | AB074918      | 7256   | III      | Japan(Sapporo)         |
| 20  | JMY-HAW      | AB074920      | 7240   | III      | Japan(Sapporo)         |
| 21  | SW-US1       | AF082843      | 7207   | III      | USA                    |
| 22  | US1          | AF060668      | 7202   | III      | USA(Minnesota)         |
| 23  | US2          | AF060669      | 7277   | III      | USA(Tennessee)         |
| 24  | JBOAR1-HYO04 | AB189070      | 7247   | III      | Japan(Hyogo)           |
| 25  | JDEER-HYO03L | AB18 9071     | 7230   | III      | Japan(Hyogo)           |
| 26  | JJT-KAN      | AB091394      | 7218   | III      | Japan(Kanagawa)        |
| 27  | JMO-HYO03L   | AB189072      | 7180   | III      | Japan(Hyogo)           |
| 28  | JRA1         | AP003430      | 7230   | III      | Japan(Tokyo)           |

|    |               |          |      |     |                        |
|----|---------------|----------|------|-----|------------------------|
| 29 | JSO-HYO03L    | AB189073 | 7180 | III | Japan(Tokyo)           |
| 30 | JTH-HYO03L    | AB189074 | 7180 | III | Japan(Tokyo)           |
| 31 | JYO-HYO03L    | AB189075 | 7180 | III | Japan(Tokyo)           |
| 32 | SWJ570        | AB073912 | 7257 | III | Japan(Tochigi)         |
| 33 | KYRGYZ        | AF455784 | 7239 | III | Kyrgyzstan             |
| 34 | ARKELL        | AY115488 | 7255 | III | Canada(Ontario,Guelph) |
| 35 | HE-JA1        | AB097812 | 7258 | IV  | Japan(Hokkaido)        |
| 36 | HE-JK4        | AB099347 | 7250 | IV  | Japan(Tochigi)         |
| 37 | HE-JI4        | AB080575 | 7186 | IV  | Japan(Tochigi)         |
| 38 | JAK-Sai       | AB074915 | 7236 | IV  | Japan(Saitama)         |
| 39 | JKK-SAP       | AB074917 | 7235 | IV  | Japan(Sapporo)         |
| 40 | JSM-SAP95     | AB161717 | 7202 | IV  | Japan(Hokkaido)        |
| 41 | JSN-SAP-FH    | AB091395 | 7234 | IV  | Japan(Hokkaido)        |
| 42 | JSN-SAP-FH02C | AB200239 | 7251 | IV  | Japan(Hokkaido)        |
| 43 | JTS-SAP02     | AB161718 | 7202 | IV  | Japan(Hokkaido)        |
| 44 | JYW-SAP02     | AB161719 | 7202 | IV  | Japan(Hokkaido)        |
| 45 | SWJ13-1       | AB097811 | 7258 | IV  | China(Uighur)          |
| 46 | SWCH25        | AY594199 | 7270 | IV  | China(Beijing)         |
| 47 | T1            | AJ272108 | 7232 | IV  | USA                    |
| 48 | CCC220        | AB108537 | 7193 | IV  | China(Changchun)       |

Table 4 Whole mitochondrial genomes of 18 eutherian mammals

| Sequence name     | Accession number | Length |
|-------------------|------------------|--------|
| Homo sapiens      | V00662           | 16569  |
| Common chimpanzee | D38116           | 16563  |
| Pygmy chimpanzee  | D38113           | 16554  |
| Gorilla           | D38114           | 16364  |
| Orangutan         | D38115           | 16389  |
| Gibbon            | X99256           | 16472  |
| Baboon            | Y18001           | 16521  |
| Horse             | X79547           | 16660  |
| White rhinoceros  | Y07726           | 16832  |
| Harbor seal       | X63726           | 16826  |
| Gray seal         | X72004           | 16797  |
| Cat               | U20753           | 17009  |
| Fin whale         | X61145           | 16398  |
| Blue whale        | X72204           | 16402  |
| Cow               | V00654           | 16338  |
| Rat               | X14848           | 16300  |
| Mouse             | V00711           | 16295  |
| Platypus          | X83427           | 17017  |

Table 5 The similarity/dissimilarity matrix of 11 species

| Species    | Chimpanzee | Gorilla | Lemur  | Rat    | Mouse  | Goat   | Bovine | Rabbit | Opossum | Gallus |
|------------|------------|---------|--------|--------|--------|--------|--------|--------|---------|--------|
| Human      | 0.0316     | 0.0286  | 0.0432 | 0.0319 | 0.0439 | 0.0373 | 0.0546 | 0.0385 | 0.0594  | 0.0862 |
| Chimpanzee |            | 0.0121  | 0.0341 | 0.0519 | 0.0656 | 0.0338 | 0.0475 | 0.0457 | 0.0649  | 0.1072 |
| Gorilla    |            |         | 0.0852 | 0.0487 | 0.0653 | 0.0352 | 0.0446 | 0.0385 | 0.0573  | 0.1058 |
| Lemur      |            |         |        | 0.0477 | 0.0653 | 0.0292 | 0.0366 | 0.0391 | 0.0605  | 0.1050 |
| Rat        |            |         |        |        | 0.0329 | 0.0343 | 0.0485 | 0.0341 | 0.0557  | 0.0822 |
| Mouse      |            |         |        |        |        | 0.0531 | 0.0747 | 0.0610 | 0.0801  | 0.0667 |
| Goat       |            |         |        |        |        |        | 0.0271 | 0.0327 | 0.0534  | 0.1041 |
| Bovine     |            |         |        |        |        |        |        | 0.0306 | 0.0429  | 0.1234 |
| Rabbit     |            |         |        |        |        |        |        |        | 0.0423  | 0.1049 |
| Opossum    |            |         |        |        |        |        |        |        |         | 0.1186 |

Table 6 Comparisons of similarity/dissimilarity indexes for 11 species

| No. | Species          | ours   | Ref [25] | Ref [20] | Ref [26] | Ref [27] |
|-----|------------------|--------|----------|----------|----------|----------|
| 1   | Human-Chimpanzee | 0.3666 | 0.3142   | 0.1987   | 0.1965   | 0.1204   |
| 2   | Human-Gorilla    | 0.3318 | 0.2595   | 0.1934   | 0.2562   | 0.0473   |
| 3   | Human-Lemur      | 0.5012 | 0.5140   | 0.4506   | 1.1974   | 0.1657   |
| 4   | Human-Rat        | 0.3701 | 0.6385   | 0.5911   | 0.6023   | 0.2742   |
| 5   | Human-Mouse      | 0.5093 | 0.5807   | 0.4296   | 0.6085   | 0.1025   |
| 6   | Human-Goat       | 0.4327 | 0.4920   | 0.4455   | 0.8131   | 0.0434   |
| 7   | Human-Bovine     | 0.6334 | 0.4873   | 0.4354   | 0.6860   | 0.3471   |
| 8   | Human-Rabbit     | 0.4466 | 0.4684   | 0.5049   | 0.6119   | 0.1914   |
| 9   | Human-Opossum    | 0.6891 | 0.9340   | 0.6912   | 1.2931   | 0.8817   |
| 10  | Human-Gallus     | 1.0000 | 1.0000   | 1.0000   | 1.0000   | 1.0000   |

Table 7 The similarity/dissimilarity matrix of 74 sequences

Columns 1 through 20

|        |        |        |        |        |        |        |        |        |        |        |        |        |        |        |        |        |        |        |        |
|--------|--------|--------|--------|--------|--------|--------|--------|--------|--------|--------|--------|--------|--------|--------|--------|--------|--------|--------|--------|
| 0      | 0.0045 | 0.0043 | 0.0087 | 0.0044 | 0.0109 | 0.0152 | 0.0150 | 0.0178 | 0.0096 | 0.0508 | 0.0516 | 0.0512 | 0.0507 | 0.0515 | 0.0516 | 0.0514 | 0.0513 | 0.0504 | 0.1644 |
| 0.0045 | 0      | 0.0030 | 0.0087 | 0.0055 | 0.0093 | 0.0175 | 0.0154 | 0.0216 | 0.0126 | 0.0540 | 0.0548 | 0.0544 | 0.0539 | 0.0547 | 0.0548 | 0.0546 | 0.0544 | 0.0536 | 0.1655 |
| 0.0043 | 0.0030 | 0      | 0.0094 | 0.0057 | 0.0115 | 0.0168 | 0.0161 | 0.0209 | 0.0123 | 0.0536 | 0.0544 | 0.0541 | 0.0535 | 0.0544 | 0.0544 | 0.0543 | 0.0541 | 0.0529 | 0.1648 |
| 0.0087 | 0.0087 | 0.0094 | 0      | 0.0082 | 0.0135 | 0.0209 | 0.0189 | 0.0209 | 0.0160 | 0.0504 | 0.0511 | 0.0507 | 0.0502 | 0.0511 | 0.0511 | 0.0510 | 0.0508 | 0.0499 | 0.1648 |
| 0.0044 | 0.0055 | 0.0057 | 0.0082 | 0      | 0.0105 | 0.0145 | 0.0129 | 0.0175 | 0.0098 | 0.0525 | 0.0533 | 0.0529 | 0.0524 | 0.0533 | 0.0534 | 0.0532 | 0.0530 | 0.0523 | 0.1651 |
| 0.0109 | 0.0093 | 0.0115 | 0.0135 | 0.0105 | 0      | 0.0194 | 0.0126 | 0.0224 | 0.0136 | 0.0566 | 0.0572 | 0.0568 | 0.0565 | 0.0572 | 0.0574 | 0.0571 | 0.0569 | 0.0565 | 0.1672 |
| 0.0152 | 0.0175 | 0.0168 | 0.0209 | 0.0145 | 0.0194 | 0      | 0.0135 | 0.0162 | 0.0097 | 0.0553 | 0.0560 | 0.0555 | 0.0552 | 0.0559 | 0.0561 | 0.0559 | 0.0558 | 0.0554 | 0.1655 |
| 0.0150 | 0.0154 | 0.0161 | 0.0189 | 0.0129 | 0.0126 | 0.0135 | 0      | 0.0185 | 0.0096 | 0.0606 | 0.0615 | 0.0609 | 0.0606 | 0.0614 | 0.0615 | 0.0612 | 0.0611 | 0.0607 | 0.1685 |
| 0.0178 | 0.0216 | 0.0209 | 0.0209 | 0.0175 | 0.0224 | 0.0162 | 0.0185 | 0      | 0.0133 | 0.0456 | 0.0465 | 0.0459 | 0.0456 | 0.0464 | 0.0466 | 0.0463 | 0.0462 | 0.0454 | 0.1624 |
| 0.0096 | 0.0126 | 0.0123 | 0.0160 | 0.0098 | 0.0136 | 0.0097 | 0.0096 | 0.0133 | 0      | 0.0532 | 0.0541 | 0.0536 | 0.0532 | 0.0540 | 0.0542 | 0.0539 | 0.0538 | 0.0530 | 0.1652 |
| 0.0508 | 0.0540 | 0.0536 | 0.0504 | 0.0525 | 0.0566 | 0.0553 | 0.0606 | 0.0456 | 0.0532 | 0      | 0.0034 | 0.0026 | 0.0016 | 0.0025 | 0.0024 | 0.0015 | 0.0025 | 0.0080 | 0.1549 |
| 0.0516 | 0.0548 | 0.0544 | 0.0511 | 0.0533 | 0.0572 | 0.0560 | 0.0615 | 0.0465 | 0.0541 | 0.0034 | 0      | 0.0015 | 0.0024 | 0.0015 | 0.0013 | 0.0023 | 0.0013 | 0.0083 | 0.1547 |
| 0.0512 | 0.0544 | 0.0541 | 0.0507 | 0.0529 | 0.0568 | 0.0555 | 0.0609 | 0.0459 | 0.0536 | 0.0026 | 0.0015 | 0      | 0.0020 | 0.0014 | 0.0016 | 0.0016 | 0.0012 | 0.0086 | 0.1548 |
| 0.0507 | 0.0539 | 0.0535 | 0.0502 | 0.0524 | 0.0565 | 0.0552 | 0.0606 | 0.0456 | 0.0532 | 0.0016 | 0.0024 | 0.0020 | 0      | 0.0018 | 0.0015 | 0.0015 | 0.0018 | 0.0076 | 0.1548 |
| 0.0515 | 0.0547 | 0.0544 | 0.0511 | 0.0533 | 0.0572 | 0.0559 | 0.0614 | 0.0464 | 0.0540 | 0.0025 | 0.0015 | 0.0014 | 0.0018 | 0      | 0.0011 | 0.0012 | 0.0009 | 0.0086 | 0.1549 |
| 0.0516 | 0.0548 | 0.0544 | 0.0511 | 0.0534 | 0.0574 | 0.0561 | 0.0615 | 0.0466 | 0.0542 | 0.0024 | 0.0013 | 0.0016 | 0.0015 | 0.0011 | 0      | 0.0015 | 0.0011 | 0.0078 | 0.1548 |
| 0.0514 | 0.0546 | 0.0543 | 0.0510 | 0.0532 | 0.0571 | 0.0559 | 0.0612 | 0.0463 | 0.0539 | 0.0015 | 0.0023 | 0.0016 | 0.0015 | 0.0012 | 0.0015 | 0      | 0.0014 | 0.0084 | 0.1549 |
| 0.0513 | 0.0544 | 0.0541 | 0.0508 | 0.0530 | 0.0569 | 0.0558 | 0.0611 | 0.0462 | 0.0538 | 0.0025 | 0.0013 | 0.0012 | 0.0018 | 0.0009 | 0.0011 | 0.0014 | 0      | 0.0084 | 0.1550 |
| 0.0504 | 0.0536 | 0.0529 | 0.0499 | 0.0523 | 0.0565 | 0.0554 | 0.0607 | 0.0454 | 0.0530 | 0.0080 | 0.0083 | 0.0086 | 0.0076 | 0.0086 | 0.0078 | 0.0084 | 0.0084 | 0      | 0.1518 |
| 0.1644 | 0.1655 | 0.1648 | 0.1648 | 0.1651 | 0.1672 | 0.1655 | 0.1685 | 0.1624 | 0.1652 | 0.1549 | 0.1547 | 0.1548 | 0.1548 | 0.1549 | 0.1548 | 0.1549 | 0.1550 | 0.1518 | 0      |
| 0.1335 | 0.1350 | 0.1341 | 0.1338 | 0.1346 | 0.1373 | 0.1356 | 0.1389 | 0.1311 | 0.1347 | 0.1207 | 0.1208 | 0.1210 | 0.1207 | 0.1210 | 0.1207 | 0.1209 | 0.1210 | 0.1168 | 0.0587 |
| 0.1315 | 0.1330 | 0.1321 | 0.1319 | 0.1326 | 0.1350 | 0.1334 | 0.1367 | 0.1287 | 0.1326 | 0.1188 | 0.1189 | 0.1191 | 0.1188 | 0.1191 | 0.1188 | 0.1190 | 0.1191 | 0.1149 | 0.0583 |

|        |        |        |        |        |        |        |        |        |        |        |        |        |        |        |        |        |        |        |        |
|--------|--------|--------|--------|--------|--------|--------|--------|--------|--------|--------|--------|--------|--------|--------|--------|--------|--------|--------|--------|
| 0.1281 | 0.1297 | 0.1288 | 0.1282 | 0.1293 | 0.1322 | 0.1305 | 0.1342 | 0.1256 | 0.1296 | 0.1130 | 0.1130 | 0.1132 | 0.1130 | 0.1132 | 0.1129 | 0.1132 | 0.1133 | 0.1089 | 0.0608 |
| 0.1305 | 0.1319 | 0.1312 | 0.1306 | 0.1316 | 0.1342 | 0.1328 | 0.1361 | 0.1281 | 0.1318 | 0.1170 | 0.1170 | 0.1171 | 0.1169 | 0.1172 | 0.1169 | 0.1171 | 0.1172 | 0.1131 | 0.0594 |
| 0.1327 | 0.1343 | 0.1335 | 0.1330 | 0.1340 | 0.1366 | 0.1351 | 0.1388 | 0.1303 | 0.1341 | 0.1174 | 0.1173 | 0.1176 | 0.1173 | 0.1175 | 0.1173 | 0.1175 | 0.1176 | 0.1133 | 0.0618 |
| 0.1379 | 0.1393 | 0.1385 | 0.1381 | 0.1389 | 0.1416 | 0.1400 | 0.1435 | 0.1356 | 0.1392 | 0.1240 | 0.1240 | 0.1242 | 0.1240 | 0.1241 | 0.1239 | 0.1241 | 0.1242 | 0.1202 | 0.0572 |
| 0.1347 | 0.1363 | 0.1355 | 0.1350 | 0.1360 | 0.1386 | 0.1369 | 0.1408 | 0.1321 | 0.1360 | 0.1184 | 0.1183 | 0.1186 | 0.1183 | 0.1185 | 0.1183 | 0.1185 | 0.1186 | 0.1144 | 0.0595 |
| 0.1328 | 0.1341 | 0.1333 | 0.1329 | 0.1339 | 0.1363 | 0.1352 | 0.1384 | 0.1304 | 0.1342 | 0.1196 | 0.1196 | 0.1198 | 0.1195 | 0.1198 | 0.1195 | 0.1197 | 0.1198 | 0.1155 | 0.0605 |
| 0.0493 | 0.0524 | 0.0516 | 0.0511 | 0.0521 | 0.0551 | 0.0539 | 0.0597 | 0.0453 | 0.0515 | 0.0198 | 0.0200 | 0.0202 | 0.0198 | 0.0198 | 0.0198 | 0.0199 | 0.0199 | 0.0172 | 0.1538 |
| 0.0493 | 0.0524 | 0.0517 | 0.0512 | 0.0521 | 0.0549 | 0.0536 | 0.0595 | 0.0451 | 0.0513 | 0.0201 | 0.0202 | 0.0205 | 0.0201 | 0.0200 | 0.0201 | 0.0201 | 0.0202 | 0.0179 | 0.1541 |
| 0.0475 | 0.0506 | 0.0499 | 0.0493 | 0.0502 | 0.0528 | 0.0520 | 0.0575 | 0.0431 | 0.0495 | 0.0202 | 0.0203 | 0.0205 | 0.0203 | 0.0201 | 0.0203 | 0.0203 | 0.0202 | 0.0183 | 0.1538 |
| 0.0486 | 0.0518 | 0.0512 | 0.0505 | 0.0513 | 0.0539 | 0.0526 | 0.0582 | 0.0436 | 0.0503 | 0.0201 | 0.0200 | 0.0202 | 0.0201 | 0.0199 | 0.0200 | 0.0201 | 0.0199 | 0.0185 | 0.1539 |
| 0.0485 | 0.0516 | 0.0508 | 0.0503 | 0.0513 | 0.0541 | 0.0533 | 0.0588 | 0.0445 | 0.0507 | 0.0197 | 0.0201 | 0.0203 | 0.0198 | 0.0199 | 0.0199 | 0.0199 | 0.0200 | 0.0169 | 0.1534 |
| 0.0494 | 0.0525 | 0.0517 | 0.0512 | 0.0523 | 0.0553 | 0.0541 | 0.0599 | 0.0455 | 0.0517 | 0.0199 | 0.0202 | 0.0204 | 0.0199 | 0.0200 | 0.0199 | 0.0200 | 0.0201 | 0.0169 | 0.1530 |
| 0.0483 | 0.0515 | 0.0507 | 0.0502 | 0.0512 | 0.0542 | 0.0529 | 0.0588 | 0.0443 | 0.0505 | 0.0193 | 0.0195 | 0.0197 | 0.0192 | 0.0193 | 0.0193 | 0.0194 | 0.0195 | 0.0165 | 0.1536 |
| 0.0481 | 0.0513 | 0.0504 | 0.0498 | 0.0510 | 0.0542 | 0.0529 | 0.0588 | 0.0442 | 0.0505 | 0.0191 | 0.0195 | 0.0197 | 0.0191 | 0.0193 | 0.0192 | 0.0193 | 0.0194 | 0.0160 | 0.1534 |
| 0.0484 | 0.0516 | 0.0508 | 0.0503 | 0.0513 | 0.0544 | 0.0530 | 0.0589 | 0.0443 | 0.0506 | 0.0192 | 0.0194 | 0.0196 | 0.0192 | 0.0193 | 0.0192 | 0.0193 | 0.0194 | 0.0166 | 0.1538 |
| 0.0692 | 0.0721 | 0.0715 | 0.0687 | 0.0713 | 0.0749 | 0.0745 | 0.0797 | 0.0646 | 0.0722 | 0.0226 | 0.0225 | 0.0232 | 0.0225 | 0.0225 | 0.0220 | 0.0225 | 0.0226 | 0.0210 | 0.1539 |
| 0.0683 | 0.0712 | 0.0705 | 0.0680 | 0.0705 | 0.0738 | 0.0735 | 0.0787 | 0.0637 | 0.0711 | 0.0222 | 0.0220 | 0.0227 | 0.0221 | 0.0221 | 0.0215 | 0.0220 | 0.0222 | 0.0202 | 0.1531 |
| 0.0696 | 0.0725 | 0.0719 | 0.0692 | 0.0718 | 0.0754 | 0.0746 | 0.0802 | 0.0653 | 0.0725 | 0.0227 | 0.0223 | 0.0231 | 0.0225 | 0.0224 | 0.0219 | 0.0224 | 0.0226 | 0.0212 | 0.1540 |
| 0.0677 | 0.0707 | 0.0701 | 0.0675 | 0.0698 | 0.0732 | 0.0724 | 0.0775 | 0.0623 | 0.0700 | 0.0216 | 0.0220 | 0.0225 | 0.0216 | 0.0219 | 0.0214 | 0.0217 | 0.0220 | 0.0199 | 0.1529 |
| 0.0670 | 0.0699 | 0.0692 | 0.0666 | 0.0691 | 0.0726 | 0.0726 | 0.0774 | 0.0623 | 0.0700 | 0.0217 | 0.0222 | 0.0227 | 0.0219 | 0.0221 | 0.0216 | 0.0218 | 0.0221 | 0.0194 | 0.1531 |
| 0.0697 | 0.0726 | 0.0720 | 0.0694 | 0.0719 | 0.0754 | 0.0746 | 0.0801 | 0.0650 | 0.0725 | 0.0232 | 0.0230 | 0.0237 | 0.0231 | 0.0230 | 0.0225 | 0.0230 | 0.0232 | 0.0212 | 0.1522 |
| 0.0658 | 0.0687 | 0.0680 | 0.0657 | 0.0680 | 0.0714 | 0.0709 | 0.0761 | 0.0611 | 0.0686 | 0.0213 | 0.0218 | 0.0223 | 0.0213 | 0.0216 | 0.0211 | 0.0214 | 0.0217 | 0.0193 | 0.1532 |
| 0.0679 | 0.0707 | 0.0701 | 0.0673 | 0.0700 | 0.0735 | 0.0732 | 0.0784 | 0.0634 | 0.0709 | 0.0217 | 0.0215 | 0.0222 | 0.0216 | 0.0216 | 0.0210 | 0.0215 | 0.0216 | 0.0198 | 0.1541 |
| 0.0436 | 0.0444 | 0.0453 | 0.0469 | 0.0421 | 0.0405 | 0.0337 | 0.0337 | 0.0393 | 0.0374 | 0.0752 | 0.0755 | 0.0749 | 0.0751 | 0.0753 | 0.0758 | 0.0755 | 0.0752 | 0.0765 | 0.1734 |
| 0.0415 | 0.0428 | 0.0436 | 0.0453 | 0.0403 | 0.0394 | 0.0303 | 0.0329 | 0.0365 | 0.0350 | 0.0699 | 0.0701 | 0.0695 | 0.0697 | 0.0699 | 0.0704 | 0.0701 | 0.0698 | 0.0718 | 0.1734 |



|        |        |        |        |        |        |        |        |        |        |        |        |        |        |        |        |        |        |        |        |
|--------|--------|--------|--------|--------|--------|--------|--------|--------|--------|--------|--------|--------|--------|--------|--------|--------|--------|--------|--------|
| 0.0423 | 0.0435 | 0.0442 | 0.0460 | 0.0407 | 0.0397 | 0.0310 | 0.0321 | 0.0362 | 0.0355 | 0.0726 | 0.0729 | 0.0724 | 0.0725 | 0.0728 | 0.0732 | 0.0729 | 0.0726 | 0.0741 | 0.1737 |
| 0.0408 | 0.0423 | 0.0429 | 0.0446 | 0.0395 | 0.0388 | 0.0294 | 0.0311 | 0.0339 | 0.0337 | 0.0702 | 0.0705 | 0.0699 | 0.0700 | 0.0703 | 0.0708 | 0.0705 | 0.0702 | 0.0715 | 0.1705 |
| 0.0418 | 0.0431 | 0.0437 | 0.0455 | 0.0404 | 0.0395 | 0.0304 | 0.0320 | 0.0356 | 0.0349 | 0.0713 | 0.0717 | 0.0711 | 0.0712 | 0.0715 | 0.0720 | 0.0717 | 0.0714 | 0.0729 | 0.1707 |
| 0.0418 | 0.0432 | 0.0440 | 0.0455 | 0.0406 | 0.0395 | 0.0307 | 0.0325 | 0.0360 | 0.0351 | 0.0704 | 0.0707 | 0.0701 | 0.0702 | 0.0705 | 0.0710 | 0.0706 | 0.0704 | 0.0721 | 0.1722 |
| 0.0395 | 0.0408 | 0.0412 | 0.0438 | 0.0382 | 0.0377 | 0.0273 | 0.0301 | 0.0341 | 0.0326 | 0.0707 | 0.0711 | 0.0706 | 0.0706 | 0.0709 | 0.0714 | 0.0710 | 0.0708 | 0.0721 | 0.1718 |
| 0.0373 | 0.0408 | 0.0401 | 0.0361 | 0.0380 | 0.0428 | 0.0399 | 0.0442 | 0.0284 | 0.0382 | 0.0243 | 0.0249 | 0.0246 | 0.0241 | 0.0251 | 0.0249 | 0.0250 | 0.0247 | 0.0229 | 0.1540 |
| 0.0363 | 0.0397 | 0.0392 | 0.0353 | 0.0370 | 0.0412 | 0.0392 | 0.0433 | 0.0276 | 0.0373 | 0.0232 | 0.0236 | 0.0234 | 0.0230 | 0.0238 | 0.0237 | 0.0238 | 0.0234 | 0.0222 | 0.1547 |
| 0.0365 | 0.0399 | 0.0392 | 0.0352 | 0.0373 | 0.0420 | 0.0394 | 0.0437 | 0.0277 | 0.0375 | 0.0236 | 0.0242 | 0.0239 | 0.0234 | 0.0245 | 0.0242 | 0.0243 | 0.0240 | 0.0221 | 0.1553 |
| 0.0378 | 0.0412 | 0.0405 | 0.0363 | 0.0385 | 0.0434 | 0.0407 | 0.0450 | 0.0291 | 0.0389 | 0.0243 | 0.0249 | 0.0246 | 0.0241 | 0.0251 | 0.0248 | 0.0250 | 0.0247 | 0.0225 | 0.1539 |
| 0.0361 | 0.0394 | 0.0390 | 0.0351 | 0.0363 | 0.0401 | 0.0376 | 0.0409 | 0.0252 | 0.0360 | 0.0284 | 0.0292 | 0.0287 | 0.0283 | 0.0292 | 0.0292 | 0.0291 | 0.0288 | 0.0282 | 0.1558 |
| 0.0382 | 0.0418 | 0.0413 | 0.0386 | 0.0389 | 0.0428 | 0.0382 | 0.0427 | 0.0261 | 0.0370 | 0.0285 | 0.0291 | 0.0286 | 0.0284 | 0.0291 | 0.0291 | 0.0290 | 0.0288 | 0.0276 | 0.1520 |
| 0.0378 | 0.0412 | 0.0406 | 0.0365 | 0.0385 | 0.0430 | 0.0406 | 0.0445 | 0.0283 | 0.0385 | 0.0240 | 0.0245 | 0.0242 | 0.0238 | 0.0248 | 0.0246 | 0.0247 | 0.0244 | 0.0226 | 0.1550 |
| 0.0559 | 0.0591 | 0.0588 | 0.0578 | 0.0580 | 0.0613 | 0.0568 | 0.0645 | 0.0505 | 0.0570 | 0.0250 | 0.0243 | 0.0242 | 0.0250 | 0.0237 | 0.0245 | 0.0244 | 0.0242 | 0.0283 | 0.1564 |
| 0.0569 | 0.0600 | 0.0597 | 0.0586 | 0.0590 | 0.0622 | 0.0582 | 0.0658 | 0.0521 | 0.0583 | 0.0253 | 0.0244 | 0.0244 | 0.0253 | 0.0239 | 0.0247 | 0.0246 | 0.0244 | 0.0288 | 0.1559 |
| 0.0604 | 0.0635 | 0.0632 | 0.0621 | 0.0625 | 0.0661 | 0.0615 | 0.0695 | 0.0556 | 0.0618 | 0.0261 | 0.0252 | 0.0251 | 0.0260 | 0.0246 | 0.0254 | 0.0253 | 0.0252 | 0.0297 | 0.1565 |
| 0.0550 | 0.0581 | 0.0579 | 0.0571 | 0.0573 | 0.0600 | 0.0566 | 0.0638 | 0.0504 | 0.0563 | 0.0259 | 0.0252 | 0.0251 | 0.0259 | 0.0247 | 0.0255 | 0.0253 | 0.0251 | 0.0291 | 0.1567 |
| 0.0523 | 0.0555 | 0.0550 | 0.0545 | 0.0546 | 0.0579 | 0.0535 | 0.0614 | 0.0474 | 0.0536 | 0.0242 | 0.0235 | 0.0236 | 0.0241 | 0.0231 | 0.0238 | 0.0237 | 0.0235 | 0.0263 | 0.1552 |
| 0.0763 | 0.0795 | 0.0786 | 0.0748 | 0.0784 | 0.0839 | 0.0810 | 0.0869 | 0.0723 | 0.0788 | 0.0380 | 0.0372 | 0.0376 | 0.0374 | 0.0378 | 0.0371 | 0.0378 | 0.0379 | 0.0353 | 0.1557 |
| 0.0747 | 0.0780 | 0.0771 | 0.0731 | 0.0766 | 0.0822 | 0.0787 | 0.0848 | 0.0702 | 0.0768 | 0.0375 | 0.0367 | 0.0371 | 0.0369 | 0.0373 | 0.0366 | 0.0374 | 0.0374 | 0.0350 | 0.1559 |
| 0.0733 | 0.0764 | 0.0755 | 0.0718 | 0.0754 | 0.0807 | 0.0782 | 0.0840 | 0.0695 | 0.0759 | 0.0355 | 0.0349 | 0.0353 | 0.0350 | 0.0355 | 0.0347 | 0.0355 | 0.0356 | 0.0323 | 0.1549 |
| 0.0750 | 0.0781 | 0.0771 | 0.0734 | 0.0771 | 0.0826 | 0.0801 | 0.0858 | 0.0714 | 0.0777 | 0.0388 | 0.0383 | 0.0388 | 0.0383 | 0.0389 | 0.0380 | 0.0388 | 0.0390 | 0.0351 | 0.1547 |
| 0.0727 | 0.0758 | 0.0749 | 0.0710 | 0.0747 | 0.0803 | 0.0773 | 0.0833 | 0.0689 | 0.0752 | 0.0356 | 0.0349 | 0.0352 | 0.0350 | 0.0355 | 0.0347 | 0.0355 | 0.0356 | 0.0328 | 0.1554 |
| 0.0627 | 0.0642 | 0.0639 | 0.0613 | 0.0656 | 0.0667 | 0.0728 | 0.0753 | 0.0650 | 0.0683 | 0.0384 | 0.0376 | 0.0385 | 0.0380 | 0.0382 | 0.0377 | 0.0382 | 0.0379 | 0.0343 | 0.1559 |
| 0.0622 | 0.0637 | 0.0633 | 0.0608 | 0.0650 | 0.0666 | 0.0725 | 0.0753 | 0.0653 | 0.0683 | 0.0380 | 0.0375 | 0.0383 | 0.0377 | 0.0379 | 0.0374 | 0.0379 | 0.0377 | 0.0342 | 0.1559 |
| 0.0596 | 0.0609 | 0.0608 | 0.0580 | 0.0625 | 0.0638 | 0.0700 | 0.0729 | 0.0636 | 0.0659 | 0.0368 | 0.0359 | 0.0367 | 0.0363 | 0.0364 | 0.0360 | 0.0365 | 0.0362 | 0.0339 | 0.1558 |

|        |        |        |        |        |        |        |        |        |        |        |        |        |        |        |        |        |        |        |        |
|--------|--------|--------|--------|--------|--------|--------|--------|--------|--------|--------|--------|--------|--------|--------|--------|--------|--------|--------|--------|
| 0.0628 | 0.0643 | 0.0640 | 0.0614 | 0.0657 | 0.0674 | 0.0730 | 0.0760 | 0.0660 | 0.0688 | 0.0371 | 0.0365 | 0.0373 | 0.0367 | 0.0370 | 0.0364 | 0.0370 | 0.0367 | 0.0336 | 0.1561 |
| 0.0627 | 0.0642 | 0.0639 | 0.0613 | 0.0656 | 0.0667 | 0.0728 | 0.0753 | 0.0650 | 0.0683 | 0.0384 | 0.0376 | 0.0385 | 0.0380 | 0.0382 | 0.0377 | 0.0382 | 0.0379 | 0.0343 | 0.1559 |

Columns 21 through 40

|        |        |        |        |        |        |        |        |        |        |        |        |        |        |        |        |        |        |        |        |
|--------|--------|--------|--------|--------|--------|--------|--------|--------|--------|--------|--------|--------|--------|--------|--------|--------|--------|--------|--------|
| 0.1335 | 0.1315 | 0.1281 | 0.1305 | 0.1327 | 0.1379 | 0.1347 | 0.1328 | 0.0493 | 0.0493 | 0.0475 | 0.0486 | 0.0485 | 0.0494 | 0.0483 | 0.0481 | 0.0484 | 0.0692 | 0.0683 | 0.0696 |
| 0.1350 | 0.1330 | 0.1297 | 0.1319 | 0.1343 | 0.1393 | 0.1363 | 0.1341 | 0.0524 | 0.0524 | 0.0506 | 0.0518 | 0.0516 | 0.0525 | 0.0515 | 0.0513 | 0.0516 | 0.0721 | 0.0712 | 0.0725 |
| 0.1341 | 0.1321 | 0.1288 | 0.1312 | 0.1335 | 0.1385 | 0.1355 | 0.1333 | 0.0516 | 0.0517 | 0.0499 | 0.0512 | 0.0508 | 0.0517 | 0.0507 | 0.0504 | 0.0508 | 0.0715 | 0.0705 | 0.0719 |
| 0.1338 | 0.1319 | 0.1282 | 0.1306 | 0.1330 | 0.1381 | 0.1350 | 0.1329 | 0.0511 | 0.0512 | 0.0493 | 0.0505 | 0.0503 | 0.0512 | 0.0502 | 0.0498 | 0.0503 | 0.0687 | 0.0680 | 0.0692 |
| 0.1346 | 0.1326 | 0.1293 | 0.1316 | 0.1340 | 0.1389 | 0.1360 | 0.1339 | 0.0521 | 0.0521 | 0.0502 | 0.0513 | 0.0513 | 0.0523 | 0.0512 | 0.0510 | 0.0513 | 0.0713 | 0.0705 | 0.0718 |
| 0.1373 | 0.1350 | 0.1322 | 0.1342 | 0.1366 | 0.1416 | 0.1386 | 0.1363 | 0.0551 | 0.0549 | 0.0528 | 0.0539 | 0.0541 | 0.0553 | 0.0542 | 0.0542 | 0.0544 | 0.0749 | 0.0738 | 0.0754 |
| 0.1356 | 0.1334 | 0.1305 | 0.1328 | 0.1351 | 0.1400 | 0.1369 | 0.1352 | 0.0539 | 0.0536 | 0.0520 | 0.0526 | 0.0533 | 0.0541 | 0.0529 | 0.0529 | 0.0530 | 0.0745 | 0.0735 | 0.0746 |
| 0.1389 | 0.1367 | 0.1342 | 0.1361 | 0.1388 | 0.1435 | 0.1408 | 0.1384 | 0.0597 | 0.0595 | 0.0575 | 0.0582 | 0.0588 | 0.0599 | 0.0588 | 0.0588 | 0.0589 | 0.0797 | 0.0787 | 0.0802 |
| 0.1311 | 0.1287 | 0.1256 | 0.1281 | 0.1303 | 0.1356 | 0.1321 | 0.1304 | 0.0453 | 0.0451 | 0.0431 | 0.0436 | 0.0445 | 0.0455 | 0.0443 | 0.0442 | 0.0443 | 0.0646 | 0.0637 | 0.0653 |
| 0.1347 | 0.1326 | 0.1296 | 0.1318 | 0.1341 | 0.1392 | 0.1360 | 0.1342 | 0.0515 | 0.0513 | 0.0495 | 0.0503 | 0.0507 | 0.0517 | 0.0505 | 0.0505 | 0.0506 | 0.0722 | 0.0711 | 0.0725 |
| 0.1207 | 0.1188 | 0.1130 | 0.1170 | 0.1174 | 0.1240 | 0.1184 | 0.1196 | 0.0198 | 0.0201 | 0.0202 | 0.0201 | 0.0197 | 0.0199 | 0.0193 | 0.0191 | 0.0192 | 0.0226 | 0.0222 | 0.0227 |
| 0.1208 | 0.1189 | 0.1130 | 0.1170 | 0.1173 | 0.1240 | 0.1183 | 0.1196 | 0.0200 | 0.0202 | 0.0203 | 0.0200 | 0.0201 | 0.0202 | 0.0195 | 0.0195 | 0.0194 | 0.0225 | 0.0220 | 0.0223 |
| 0.1210 | 0.1191 | 0.1132 | 0.1171 | 0.1176 | 0.1242 | 0.1186 | 0.1198 | 0.0202 | 0.0205 | 0.0205 | 0.0202 | 0.0203 | 0.0204 | 0.0197 | 0.0197 | 0.0196 | 0.0232 | 0.0227 | 0.0231 |
| 0.1207 | 0.1188 | 0.1130 | 0.1169 | 0.1173 | 0.1240 | 0.1183 | 0.1195 | 0.0198 | 0.0201 | 0.0203 | 0.0201 | 0.0198 | 0.0199 | 0.0192 | 0.0191 | 0.0192 | 0.0225 | 0.0221 | 0.0225 |
| 0.1210 | 0.1191 | 0.1132 | 0.1172 | 0.1175 | 0.1241 | 0.1185 | 0.1198 | 0.0198 | 0.0200 | 0.0201 | 0.0199 | 0.0199 | 0.0200 | 0.0193 | 0.0193 | 0.0193 | 0.0225 | 0.0221 | 0.0224 |
| 0.1207 | 0.1188 | 0.1129 | 0.1169 | 0.1173 | 0.1239 | 0.1183 | 0.1195 | 0.0198 | 0.0201 | 0.0203 | 0.0200 | 0.0199 | 0.0199 | 0.0193 | 0.0192 | 0.0192 | 0.0220 | 0.0215 | 0.0219 |
| 0.1209 | 0.1190 | 0.1132 | 0.1171 | 0.1175 | 0.1241 | 0.1185 | 0.1197 | 0.0199 | 0.0201 | 0.0203 | 0.0201 | 0.0199 | 0.0200 | 0.0194 | 0.0193 | 0.0193 | 0.0225 | 0.0220 | 0.0224 |
| 0.1210 | 0.1191 | 0.1133 | 0.1172 | 0.1176 | 0.1242 | 0.1186 | 0.1198 | 0.0199 | 0.0202 | 0.0202 | 0.0199 | 0.0200 | 0.0201 | 0.0195 | 0.0194 | 0.0194 | 0.0226 | 0.0222 | 0.0226 |
| 0.1168 | 0.1149 | 0.1089 | 0.1131 | 0.1133 | 0.1202 | 0.1144 | 0.1155 | 0.0172 | 0.0179 | 0.0183 | 0.0185 | 0.0169 | 0.0169 | 0.0165 | 0.0160 | 0.0166 | 0.0210 | 0.0202 | 0.0212 |
| 0.0587 | 0.0583 | 0.0608 | 0.0594 | 0.0618 | 0.0572 | 0.0595 | 0.0605 | 0.1538 | 0.1541 | 0.1538 | 0.1539 | 0.1534 | 0.1530 | 0.1536 | 0.1534 | 0.1538 | 0.1539 | 0.1531 | 0.1540 |
| 0      | 0.0057 | 0.0115 | 0.0066 | 0.0115 | 0.0084 | 0.0139 | 0.0062 | 0.1196 | 0.1199 | 0.1195 | 0.1200 | 0.1189 | 0.1181 | 0.1194 | 0.1188 | 0.1195 | 0.1180 | 0.1172 | 0.1184 |

|        |        |        |        |        |        |        |        |        |        |        |        |        |        |        |        |        |        |        |        |
|--------|--------|--------|--------|--------|--------|--------|--------|--------|--------|--------|--------|--------|--------|--------|--------|--------|--------|--------|--------|
| 0.0057 | 0      | 0.0125 | 0.0083 | 0.0123 | 0.0109 | 0.0149 | 0.0064 | 0.1174 | 0.1177 | 0.1172 | 0.1176 | 0.1167 | 0.1159 | 0.1171 | 0.1166 | 0.1173 | 0.1163 | 0.1154 | 0.1167 |
| 0.0115 | 0.0125 | 0      | 0.0086 | 0.0088 | 0.0143 | 0.0104 | 0.0114 | 0.1119 | 0.1123 | 0.1120 | 0.1124 | 0.1113 | 0.1105 | 0.1117 | 0.1111 | 0.1118 | 0.1095 | 0.1088 | 0.1097 |
| 0.0066 | 0.0083 | 0.0086 | 0      | 0.0094 | 0.0098 | 0.0119 | 0.0082 | 0.1160 | 0.1164 | 0.1159 | 0.1164 | 0.1154 | 0.1146 | 0.1158 | 0.1153 | 0.1160 | 0.1144 | 0.1136 | 0.1146 |
| 0.0115 | 0.0123 | 0.0088 | 0.0094 | 0      | 0.0116 | 0.0065 | 0.0102 | 0.1157 | 0.1161 | 0.1159 | 0.1163 | 0.1152 | 0.1143 | 0.1156 | 0.1150 | 0.1157 | 0.1135 | 0.1126 | 0.1136 |
| 0.0084 | 0.0109 | 0.0143 | 0.0098 | 0.0116 | 0      | 0.0122 | 0.0093 | 0.1231 | 0.1235 | 0.1231 | 0.1235 | 0.1225 | 0.1217 | 0.1229 | 0.1224 | 0.1231 | 0.1210 | 0.1202 | 0.1213 |
| 0.0139 | 0.0149 | 0.0104 | 0.0119 | 0.0065 | 0.0122 | 0      | 0.0137 | 0.1170 | 0.1174 | 0.1173 | 0.1176 | 0.1164 | 0.1156 | 0.1168 | 0.1163 | 0.1170 | 0.1143 | 0.1133 | 0.1143 |
| 0.0062 | 0.0064 | 0.0114 | 0.0082 | 0.0102 | 0.0093 | 0.0137 | 0      | 0.1181 | 0.1185 | 0.1180 | 0.1185 | 0.1174 | 0.1166 | 0.1179 | 0.1173 | 0.1181 | 0.1164 | 0.1156 | 0.1168 |
| 0.1196 | 0.1174 | 0.1119 | 0.1160 | 0.1157 | 0.1231 | 0.1170 | 0.1181 | 0      | 0.0018 | 0.0051 | 0.0057 | 0.0022 | 0.0020 | 0.0018 | 0.0024 | 0.0014 | 0.0269 | 0.0248 | 0.0271 |
| 0.1199 | 0.1177 | 0.1123 | 0.1164 | 0.1161 | 0.1235 | 0.1174 | 0.1185 | 0.0018 | 0      | 0.0041 | 0.0042 | 0.0028 | 0.0031 | 0.0025 | 0.0038 | 0.0023 | 0.0276 | 0.0255 | 0.0278 |
| 0.1195 | 0.1172 | 0.1120 | 0.1159 | 0.1159 | 0.1231 | 0.1173 | 0.1180 | 0.0051 | 0.0041 | 0      | 0.0031 | 0.0052 | 0.0055 | 0.0053 | 0.0059 | 0.0050 | 0.0294 | 0.0275 | 0.0300 |
| 0.1200 | 0.1176 | 0.1124 | 0.1164 | 0.1163 | 0.1235 | 0.1176 | 0.1185 | 0.0057 | 0.0042 | 0.0031 | 0      | 0.0060 | 0.0065 | 0.0058 | 0.0069 | 0.0055 | 0.0290 | 0.0271 | 0.0295 |
| 0.1189 | 0.1167 | 0.1113 | 0.1154 | 0.1152 | 0.1225 | 0.1164 | 0.1174 | 0.0022 | 0.0028 | 0.0052 | 0.0060 | 0      | 0.0024 | 0.0016 | 0.0025 | 0.0023 | 0.0272 | 0.0251 | 0.0275 |
| 0.1181 | 0.1159 | 0.1105 | 0.1146 | 0.1143 | 0.1217 | 0.1156 | 0.1166 | 0.0020 | 0.0031 | 0.0055 | 0.0065 | 0.0024 | 0      | 0.0027 | 0.0021 | 0.0024 | 0.0266 | 0.0245 | 0.0268 |
| 0.1194 | 0.1171 | 0.1117 | 0.1158 | 0.1156 | 0.1229 | 0.1168 | 0.1179 | 0.0018 | 0.0025 | 0.0053 | 0.0058 | 0.0016 | 0.0027 | 0      | 0.0023 | 0.0011 | 0.0274 | 0.0252 | 0.0275 |
| 0.1188 | 0.1166 | 0.1111 | 0.1153 | 0.1150 | 0.1224 | 0.1163 | 0.1173 | 0.0024 | 0.0038 | 0.0059 | 0.0069 | 0.0025 | 0.0021 | 0.0023 | 0      | 0.0020 | 0.0268 | 0.0249 | 0.0271 |
| 0.1195 | 0.1173 | 0.1118 | 0.1160 | 0.1157 | 0.1231 | 0.1170 | 0.1181 | 0.0014 | 0.0023 | 0.0050 | 0.0055 | 0.0023 | 0.0024 | 0.0011 | 0.0020 | 0      | 0.0273 | 0.0253 | 0.0274 |
| 0.1180 | 0.1163 | 0.1095 | 0.1144 | 0.1135 | 0.1210 | 0.1143 | 0.1164 | 0.0269 | 0.0276 | 0.0294 | 0.0290 | 0.0272 | 0.0266 | 0.0274 | 0.0268 | 0.0273 | 0      | 0.0041 | 0.0052 |
| 0.1172 | 0.1154 | 0.1088 | 0.1136 | 0.1126 | 0.1202 | 0.1133 | 0.1156 | 0.0248 | 0.0255 | 0.0275 | 0.0271 | 0.0251 | 0.0245 | 0.0252 | 0.0249 | 0.0253 | 0.0041 | 0      | 0.0047 |
| 0.1184 | 0.1167 | 0.1097 | 0.1146 | 0.1136 | 0.1213 | 0.1143 | 0.1168 | 0.0271 | 0.0278 | 0.0300 | 0.0295 | 0.0275 | 0.0268 | 0.0275 | 0.0271 | 0.0274 | 0.0052 | 0.0047 | 0      |
| 0.1168 | 0.1150 | 0.1085 | 0.1133 | 0.1124 | 0.1200 | 0.1131 | 0.1153 | 0.0259 | 0.0265 | 0.0285 | 0.0278 | 0.0259 | 0.0255 | 0.0261 | 0.0258 | 0.0262 | 0.0071 | 0.0062 | 0.0077 |
| 0.1165 | 0.1148 | 0.1083 | 0.1130 | 0.1122 | 0.1197 | 0.1131 | 0.1149 | 0.0256 | 0.0264 | 0.0281 | 0.0279 | 0.0255 | 0.0251 | 0.0259 | 0.0253 | 0.0260 | 0.0056 | 0.0057 | 0.0086 |
| 0.1161 | 0.1143 | 0.1075 | 0.1124 | 0.1113 | 0.1190 | 0.1121 | 0.1145 | 0.0263 | 0.0270 | 0.0291 | 0.0286 | 0.0267 | 0.0259 | 0.0268 | 0.0263 | 0.0267 | 0.0043 | 0.0029 | 0.0039 |
| 0.1169 | 0.1151 | 0.1087 | 0.1135 | 0.1127 | 0.1202 | 0.1135 | 0.1154 | 0.0240 | 0.0246 | 0.0266 | 0.0262 | 0.0240 | 0.0235 | 0.0243 | 0.0238 | 0.0244 | 0.0061 | 0.0057 | 0.0083 |
| 0.1183 | 0.1166 | 0.1099 | 0.1147 | 0.1138 | 0.1214 | 0.1147 | 0.1167 | 0.0254 | 0.0261 | 0.0280 | 0.0276 | 0.0257 | 0.0251 | 0.0258 | 0.0253 | 0.0258 | 0.0020 | 0.0035 | 0.0051 |
| 0.1447 | 0.1419 | 0.1412 | 0.1419 | 0.1451 | 0.1488 | 0.1472 | 0.1444 | 0.0749 | 0.0740 | 0.0715 | 0.0715 | 0.0743 | 0.0751 | 0.0740 | 0.0745 | 0.0740 | 0.0946 | 0.0936 | 0.0951 |
| 0.1461 | 0.1434 | 0.1420 | 0.1431 | 0.1460 | 0.1502 | 0.1479 | 0.1459 | 0.0698 | 0.0689 | 0.0667 | 0.0664 | 0.0694 | 0.0702 | 0.0689 | 0.0696 | 0.0689 | 0.0896 | 0.0886 | 0.0897 |

|        |        |        |        |        |        |        |        |        |        |        |        |        |        |        |        |        |        |        |        |
|--------|--------|--------|--------|--------|--------|--------|--------|--------|--------|--------|--------|--------|--------|--------|--------|--------|--------|--------|--------|
| 0.1460 | 0.1432 | 0.1421 | 0.1432 | 0.1461 | 0.1501 | 0.1481 | 0.1457 | 0.0724 | 0.0715 | 0.0691 | 0.0690 | 0.0718 | 0.0727 | 0.0715 | 0.0720 | 0.0715 | 0.0921 | 0.0912 | 0.0925 |
| 0.1434 | 0.1406 | 0.1394 | 0.1406 | 0.1435 | 0.1477 | 0.1454 | 0.1432 | 0.0697 | 0.0688 | 0.0665 | 0.0663 | 0.0692 | 0.0701 | 0.0688 | 0.0694 | 0.0688 | 0.0895 | 0.0886 | 0.0899 |
| 0.1435 | 0.1407 | 0.1396 | 0.1407 | 0.1437 | 0.1477 | 0.1456 | 0.1433 | 0.0710 | 0.0701 | 0.0678 | 0.0676 | 0.0705 | 0.0714 | 0.0701 | 0.0707 | 0.0701 | 0.0908 | 0.0898 | 0.0911 |
| 0.1448 | 0.1420 | 0.1408 | 0.1418 | 0.1448 | 0.1489 | 0.1467 | 0.1445 | 0.0703 | 0.0694 | 0.0671 | 0.0669 | 0.0698 | 0.0707 | 0.0694 | 0.0701 | 0.0695 | 0.0899 | 0.0889 | 0.0902 |
| 0.1446 | 0.1418 | 0.1405 | 0.1418 | 0.1445 | 0.1487 | 0.1465 | 0.1443 | 0.0696 | 0.0688 | 0.0666 | 0.0665 | 0.0692 | 0.0700 | 0.0688 | 0.0693 | 0.0688 | 0.0902 | 0.0891 | 0.0904 |
| 0.1191 | 0.1170 | 0.1123 | 0.1157 | 0.1169 | 0.1229 | 0.1185 | 0.1180 | 0.0313 | 0.0314 | 0.0299 | 0.0302 | 0.0305 | 0.0310 | 0.0303 | 0.0299 | 0.0303 | 0.0412 | 0.0408 | 0.0419 |
| 0.1205 | 0.1183 | 0.1137 | 0.1171 | 0.1182 | 0.1243 | 0.1198 | 0.1193 | 0.0294 | 0.0294 | 0.0277 | 0.0280 | 0.0286 | 0.0293 | 0.0284 | 0.0282 | 0.0285 | 0.0408 | 0.0402 | 0.0416 |
| 0.1212 | 0.1191 | 0.1143 | 0.1179 | 0.1190 | 0.1252 | 0.1206 | 0.1201 | 0.0299 | 0.0300 | 0.0287 | 0.0288 | 0.0291 | 0.0298 | 0.0289 | 0.0285 | 0.0289 | 0.0404 | 0.0400 | 0.0413 |
| 0.1193 | 0.1172 | 0.1124 | 0.1159 | 0.1171 | 0.1232 | 0.1187 | 0.1182 | 0.0311 | 0.0313 | 0.0301 | 0.0303 | 0.0304 | 0.0309 | 0.0302 | 0.0297 | 0.0302 | 0.0406 | 0.0402 | 0.0414 |
| 0.1214 | 0.1191 | 0.1151 | 0.1182 | 0.1197 | 0.1255 | 0.1214 | 0.1203 | 0.0345 | 0.0343 | 0.0323 | 0.0324 | 0.0336 | 0.0344 | 0.0336 | 0.0334 | 0.0336 | 0.0455 | 0.0451 | 0.0467 |
| 0.1180 | 0.1155 | 0.1116 | 0.1147 | 0.1162 | 0.1220 | 0.1177 | 0.1170 | 0.0323 | 0.0319 | 0.0300 | 0.0296 | 0.0314 | 0.0321 | 0.0312 | 0.0312 | 0.0313 | 0.0451 | 0.0445 | 0.0461 |
| 0.1205 | 0.1183 | 0.1137 | 0.1171 | 0.1183 | 0.1244 | 0.1199 | 0.1194 | 0.0306 | 0.0307 | 0.0292 | 0.0293 | 0.0298 | 0.0305 | 0.0297 | 0.0293 | 0.0297 | 0.0407 | 0.0403 | 0.0416 |
| 0.1240 | 0.1217 | 0.1168 | 0.1203 | 0.1206 | 0.1270 | 0.1217 | 0.1229 | 0.0247 | 0.0238 | 0.0229 | 0.0218 | 0.0256 | 0.0253 | 0.0247 | 0.0255 | 0.0243 | 0.0366 | 0.0359 | 0.0364 |
| 0.1242 | 0.1219 | 0.1168 | 0.1203 | 0.1207 | 0.1270 | 0.1217 | 0.1231 | 0.0255 | 0.0247 | 0.0239 | 0.0230 | 0.0265 | 0.0261 | 0.0255 | 0.0264 | 0.0251 | 0.0366 | 0.0359 | 0.0362 |
| 0.1244 | 0.1223 | 0.1169 | 0.1205 | 0.1208 | 0.1271 | 0.1216 | 0.1234 | 0.0276 | 0.0269 | 0.0267 | 0.0257 | 0.0286 | 0.0281 | 0.0276 | 0.0284 | 0.0273 | 0.0359 | 0.0353 | 0.0352 |
| 0.1242 | 0.1218 | 0.1170 | 0.1204 | 0.1208 | 0.1271 | 0.1219 | 0.1230 | 0.0243 | 0.0233 | 0.0221 | 0.0213 | 0.0251 | 0.0249 | 0.0243 | 0.0253 | 0.0240 | 0.0376 | 0.0367 | 0.0375 |
| 0.1228 | 0.1205 | 0.1155 | 0.1191 | 0.1193 | 0.1259 | 0.1205 | 0.1217 | 0.0202 | 0.0193 | 0.0185 | 0.0176 | 0.0212 | 0.0208 | 0.0202 | 0.0211 | 0.0198 | 0.0359 | 0.0349 | 0.0357 |
| 0.1204 | 0.1198 | 0.1111 | 0.1164 | 0.1157 | 0.1234 | 0.1161 | 0.1197 | 0.0451 | 0.0462 | 0.0483 | 0.0478 | 0.0455 | 0.0447 | 0.0449 | 0.0443 | 0.0448 | 0.0329 | 0.0333 | 0.0302 |
| 0.1208 | 0.1201 | 0.1116 | 0.1167 | 0.1163 | 0.1238 | 0.1166 | 0.1202 | 0.0452 | 0.0462 | 0.0482 | 0.0475 | 0.0455 | 0.0448 | 0.0449 | 0.0444 | 0.0448 | 0.0343 | 0.0347 | 0.0315 |
| 0.1194 | 0.1187 | 0.1102 | 0.1154 | 0.1148 | 0.1225 | 0.1152 | 0.1187 | 0.0420 | 0.0432 | 0.0453 | 0.0449 | 0.0423 | 0.0416 | 0.0418 | 0.0412 | 0.0417 | 0.0306 | 0.0308 | 0.0280 |
| 0.1191 | 0.1184 | 0.1097 | 0.1152 | 0.1143 | 0.1221 | 0.1147 | 0.1182 | 0.0445 | 0.0457 | 0.0479 | 0.0477 | 0.0447 | 0.0440 | 0.0443 | 0.0435 | 0.0442 | 0.0329 | 0.0331 | 0.0305 |
| 0.1201 | 0.1194 | 0.1109 | 0.1161 | 0.1156 | 0.1232 | 0.1161 | 0.1194 | 0.0431 | 0.0442 | 0.0461 | 0.0458 | 0.0434 | 0.0427 | 0.0428 | 0.0422 | 0.0427 | 0.0323 | 0.0327 | 0.0297 |
| 0.1216 | 0.1200 | 0.1131 | 0.1176 | 0.1167 | 0.1246 | 0.1180 | 0.1192 | 0.0333 | 0.0344 | 0.0352 | 0.0366 | 0.0331 | 0.0331 | 0.0337 | 0.0331 | 0.0340 | 0.0342 | 0.0326 | 0.0342 |
| 0.1216 | 0.1201 | 0.1131 | 0.1176 | 0.1168 | 0.1245 | 0.1180 | 0.1192 | 0.0342 | 0.0354 | 0.0362 | 0.0378 | 0.0340 | 0.0339 | 0.0346 | 0.0338 | 0.0348 | 0.0343 | 0.0329 | 0.0342 |
| 0.1221 | 0.1206 | 0.1137 | 0.1179 | 0.1175 | 0.1250 | 0.1188 | 0.1199 | 0.0336 | 0.0346 | 0.0349 | 0.0365 | 0.0335 | 0.0335 | 0.0339 | 0.0334 | 0.0341 | 0.0360 | 0.0348 | 0.0356 |
| 0.1217 | 0.1203 | 0.1131 | 0.1177 | 0.1169 | 0.1246 | 0.1181 | 0.1195 | 0.0337 | 0.0349 | 0.0359 | 0.0374 | 0.0336 | 0.0335 | 0.0341 | 0.0334 | 0.0343 | 0.0331 | 0.0317 | 0.0326 |

|                       |        |        |        |        |        |        |        |        |        |        |        |        |        |        |        |        |        |        |        |
|-----------------------|--------|--------|--------|--------|--------|--------|--------|--------|--------|--------|--------|--------|--------|--------|--------|--------|--------|--------|--------|
| 0.1216                | 0.1200 | 0.1131 | 0.1176 | 0.1167 | 0.1246 | 0.1180 | 0.1192 | 0.0333 | 0.0344 | 0.0352 | 0.0366 | 0.0331 | 0.0331 | 0.0337 | 0.0331 | 0.0340 | 0.0342 | 0.0326 | 0.0342 |
| Columns 41 through 60 |        |        |        |        |        |        |        |        |        |        |        |        |        |        |        |        |        |        |        |
| 0.0677                | 0.0670 | 0.0697 | 0.0658 | 0.0679 | 0.0436 | 0.0415 | 0.0423 | 0.0408 | 0.0418 | 0.0418 | 0.0395 | 0.0373 | 0.0363 | 0.0365 | 0.0378 | 0.0361 | 0.0382 | 0.0378 | 0.0559 |
| 0.0707                | 0.0699 | 0.0726 | 0.0687 | 0.0707 | 0.0444 | 0.0428 | 0.0435 | 0.0423 | 0.0431 | 0.0432 | 0.0408 | 0.0408 | 0.0397 | 0.0399 | 0.0412 | 0.0394 | 0.0418 | 0.0412 | 0.0591 |
| 0.0701                | 0.0692 | 0.0720 | 0.0680 | 0.0701 | 0.0453 | 0.0436 | 0.0442 | 0.0429 | 0.0437 | 0.0440 | 0.0412 | 0.0401 | 0.0392 | 0.0392 | 0.0405 | 0.0390 | 0.0413 | 0.0406 | 0.0588 |
| 0.0675                | 0.0666 | 0.0694 | 0.0657 | 0.0673 | 0.0469 | 0.0453 | 0.0460 | 0.0446 | 0.0455 | 0.0455 | 0.0438 | 0.0361 | 0.0353 | 0.0352 | 0.0363 | 0.0351 | 0.0386 | 0.0365 | 0.0578 |
| 0.0698                | 0.0691 | 0.0719 | 0.0680 | 0.0700 | 0.0421 | 0.0403 | 0.0407 | 0.0395 | 0.0404 | 0.0406 | 0.0382 | 0.0380 | 0.0370 | 0.0373 | 0.0385 | 0.0363 | 0.0389 | 0.0385 | 0.0580 |
| 0.0732                | 0.0726 | 0.0754 | 0.0714 | 0.0735 | 0.0405 | 0.0394 | 0.0397 | 0.0388 | 0.0395 | 0.0395 | 0.0377 | 0.0428 | 0.0412 | 0.0420 | 0.0434 | 0.0401 | 0.0428 | 0.0430 | 0.0613 |
| 0.0724                | 0.0726 | 0.0746 | 0.0709 | 0.0732 | 0.0337 | 0.0303 | 0.0310 | 0.0294 | 0.0304 | 0.0307 | 0.0273 | 0.0399 | 0.0392 | 0.0394 | 0.0407 | 0.0376 | 0.0382 | 0.0406 | 0.0568 |
| 0.0775                | 0.0774 | 0.0801 | 0.0761 | 0.0784 | 0.0337 | 0.0329 | 0.0321 | 0.0311 | 0.0320 | 0.0325 | 0.0301 | 0.0442 | 0.0433 | 0.0437 | 0.0450 | 0.0409 | 0.0427 | 0.0445 | 0.0645 |
| 0.0623                | 0.0623 | 0.0650 | 0.0611 | 0.0634 | 0.0393 | 0.0365 | 0.0362 | 0.0339 | 0.0356 | 0.0360 | 0.0341 | 0.0284 | 0.0276 | 0.0277 | 0.0291 | 0.0252 | 0.0261 | 0.0283 | 0.0505 |
| 0.0700                | 0.0700 | 0.0725 | 0.0686 | 0.0709 | 0.0374 | 0.0350 | 0.0355 | 0.0337 | 0.0349 | 0.0351 | 0.0326 | 0.0382 | 0.0373 | 0.0375 | 0.0389 | 0.0360 | 0.0370 | 0.0385 | 0.0570 |
| 0.0216                | 0.0217 | 0.0232 | 0.0213 | 0.0217 | 0.0752 | 0.0699 | 0.0726 | 0.0702 | 0.0713 | 0.0704 | 0.0707 | 0.0243 | 0.0232 | 0.0236 | 0.0243 | 0.0284 | 0.0285 | 0.0240 | 0.0250 |
| 0.0220                | 0.0222 | 0.0230 | 0.0218 | 0.0215 | 0.0755 | 0.0701 | 0.0729 | 0.0705 | 0.0717 | 0.0707 | 0.0711 | 0.0249 | 0.0236 | 0.0242 | 0.0249 | 0.0292 | 0.0291 | 0.0245 | 0.0243 |
| 0.0225                | 0.0227 | 0.0237 | 0.0223 | 0.0222 | 0.0749 | 0.0695 | 0.0724 | 0.0699 | 0.0711 | 0.0701 | 0.0706 | 0.0246 | 0.0234 | 0.0239 | 0.0246 | 0.0287 | 0.0286 | 0.0242 | 0.0242 |
| 0.0216                | 0.0219 | 0.0231 | 0.0213 | 0.0216 | 0.0751 | 0.0697 | 0.0725 | 0.0700 | 0.0712 | 0.0702 | 0.0706 | 0.0241 | 0.0230 | 0.0234 | 0.0241 | 0.0283 | 0.0284 | 0.0238 | 0.0250 |
| 0.0219                | 0.0221 | 0.0230 | 0.0216 | 0.0216 | 0.0753 | 0.0699 | 0.0728 | 0.0703 | 0.0715 | 0.0705 | 0.0709 | 0.0251 | 0.0238 | 0.0245 | 0.0251 | 0.0292 | 0.0291 | 0.0248 | 0.0237 |
| 0.0214                | 0.0216 | 0.0225 | 0.0211 | 0.0210 | 0.0758 | 0.0704 | 0.0732 | 0.0708 | 0.0720 | 0.0710 | 0.0714 | 0.0249 | 0.0237 | 0.0242 | 0.0248 | 0.0292 | 0.0291 | 0.0246 | 0.0245 |
| 0.0217                | 0.0218 | 0.0230 | 0.0214 | 0.0215 | 0.0755 | 0.0701 | 0.0729 | 0.0705 | 0.0717 | 0.0706 | 0.0710 | 0.0250 | 0.0238 | 0.0243 | 0.0250 | 0.0291 | 0.0290 | 0.0247 | 0.0244 |
| 0.0220                | 0.0221 | 0.0232 | 0.0217 | 0.0216 | 0.0752 | 0.0698 | 0.0726 | 0.0702 | 0.0714 | 0.0704 | 0.0708 | 0.0247 | 0.0234 | 0.0240 | 0.0247 | 0.0288 | 0.0288 | 0.0244 | 0.0242 |
| 0.0199                | 0.0194 | 0.0212 | 0.0193 | 0.0198 | 0.0765 | 0.0718 | 0.0741 | 0.0715 | 0.0729 | 0.0721 | 0.0721 | 0.0229 | 0.0222 | 0.0221 | 0.0225 | 0.0282 | 0.0276 | 0.0226 | 0.0283 |
| 0.1529                | 0.1531 | 0.1522 | 0.1532 | 0.1541 | 0.1734 | 0.1734 | 0.1737 | 0.1705 | 0.1707 | 0.1722 | 0.1718 | 0.1540 | 0.1547 | 0.1553 | 0.1539 | 0.1558 | 0.1520 | 0.1550 | 0.1564 |
| 0.1168                | 0.1165 | 0.1161 | 0.1169 | 0.1183 | 0.1447 | 0.1461 | 0.1460 | 0.1434 | 0.1435 | 0.1448 | 0.1446 | 0.1191 | 0.1205 | 0.1212 | 0.1193 | 0.1214 | 0.1180 | 0.1205 | 0.1240 |
| 0.1150                | 0.1148 | 0.1143 | 0.1151 | 0.1166 | 0.1419 | 0.1434 | 0.1432 | 0.1406 | 0.1407 | 0.1420 | 0.1418 | 0.1170 | 0.1183 | 0.1191 | 0.1172 | 0.1191 | 0.1155 | 0.1183 | 0.1217 |
| 0.1085                | 0.1083 | 0.1075 | 0.1087 | 0.1099 | 0.1412 | 0.1420 | 0.1421 | 0.1394 | 0.1396 | 0.1408 | 0.1405 | 0.1123 | 0.1137 | 0.1143 | 0.1124 | 0.1151 | 0.1116 | 0.1137 | 0.1168 |

|        |        |        |        |        |        |        |        |        |        |        |        |        |        |        |        |        |        |        |        |
|--------|--------|--------|--------|--------|--------|--------|--------|--------|--------|--------|--------|--------|--------|--------|--------|--------|--------|--------|--------|
| 0.1133 | 0.1130 | 0.1124 | 0.1135 | 0.1147 | 0.1419 | 0.1431 | 0.1432 | 0.1406 | 0.1407 | 0.1418 | 0.1418 | 0.1157 | 0.1171 | 0.1179 | 0.1159 | 0.1182 | 0.1147 | 0.1171 | 0.1203 |
| 0.1124 | 0.1122 | 0.1113 | 0.1127 | 0.1138 | 0.1451 | 0.1460 | 0.1461 | 0.1435 | 0.1437 | 0.1448 | 0.1445 | 0.1169 | 0.1182 | 0.1190 | 0.1171 | 0.1197 | 0.1162 | 0.1183 | 0.1206 |
| 0.1200 | 0.1197 | 0.1190 | 0.1202 | 0.1214 | 0.1488 | 0.1502 | 0.1501 | 0.1477 | 0.1477 | 0.1489 | 0.1487 | 0.1229 | 0.1243 | 0.1252 | 0.1232 | 0.1255 | 0.1220 | 0.1244 | 0.1270 |
| 0.1131 | 0.1131 | 0.1121 | 0.1135 | 0.1147 | 0.1472 | 0.1479 | 0.1481 | 0.1454 | 0.1456 | 0.1467 | 0.1465 | 0.1185 | 0.1198 | 0.1206 | 0.1187 | 0.1214 | 0.1177 | 0.1199 | 0.1217 |
| 0.1153 | 0.1149 | 0.1145 | 0.1154 | 0.1167 | 0.1444 | 0.1459 | 0.1457 | 0.1432 | 0.1433 | 0.1445 | 0.1443 | 0.1180 | 0.1193 | 0.1201 | 0.1182 | 0.1203 | 0.1170 | 0.1194 | 0.1229 |
| 0.0259 | 0.0256 | 0.0263 | 0.0240 | 0.0254 | 0.0749 | 0.0698 | 0.0724 | 0.0697 | 0.0710 | 0.0703 | 0.0696 | 0.0313 | 0.0294 | 0.0299 | 0.0311 | 0.0345 | 0.0323 | 0.0306 | 0.0247 |
| 0.0265 | 0.0264 | 0.0270 | 0.0246 | 0.0261 | 0.0740 | 0.0689 | 0.0715 | 0.0688 | 0.0701 | 0.0694 | 0.0688 | 0.0314 | 0.0294 | 0.0300 | 0.0313 | 0.0343 | 0.0319 | 0.0307 | 0.0238 |
| 0.0285 | 0.0281 | 0.0291 | 0.0266 | 0.0280 | 0.0715 | 0.0667 | 0.0691 | 0.0665 | 0.0678 | 0.0671 | 0.0666 | 0.0299 | 0.0277 | 0.0287 | 0.0301 | 0.0323 | 0.0300 | 0.0292 | 0.0229 |
| 0.0278 | 0.0279 | 0.0286 | 0.0262 | 0.0276 | 0.0715 | 0.0664 | 0.0690 | 0.0663 | 0.0676 | 0.0669 | 0.0665 | 0.0302 | 0.0280 | 0.0288 | 0.0303 | 0.0324 | 0.0296 | 0.0293 | 0.0218 |
| 0.0259 | 0.0255 | 0.0267 | 0.0240 | 0.0257 | 0.0743 | 0.0694 | 0.0718 | 0.0692 | 0.0705 | 0.0698 | 0.0692 | 0.0305 | 0.0286 | 0.0291 | 0.0304 | 0.0336 | 0.0314 | 0.0298 | 0.0256 |
| 0.0255 | 0.0251 | 0.0259 | 0.0235 | 0.0251 | 0.0751 | 0.0702 | 0.0727 | 0.0701 | 0.0714 | 0.0707 | 0.0700 | 0.0310 | 0.0293 | 0.0298 | 0.0309 | 0.0344 | 0.0321 | 0.0305 | 0.0253 |
| 0.0261 | 0.0259 | 0.0268 | 0.0243 | 0.0258 | 0.0740 | 0.0689 | 0.0715 | 0.0688 | 0.0701 | 0.0694 | 0.0688 | 0.0303 | 0.0284 | 0.0289 | 0.0302 | 0.0336 | 0.0312 | 0.0297 | 0.0247 |
| 0.0258 | 0.0253 | 0.0263 | 0.0238 | 0.0253 | 0.0745 | 0.0696 | 0.0720 | 0.0694 | 0.0707 | 0.0701 | 0.0693 | 0.0299 | 0.0282 | 0.0285 | 0.0297 | 0.0334 | 0.0312 | 0.0293 | 0.0255 |
| 0.0262 | 0.0260 | 0.0267 | 0.0244 | 0.0258 | 0.0740 | 0.0689 | 0.0715 | 0.0688 | 0.0701 | 0.0695 | 0.0688 | 0.0303 | 0.0285 | 0.0289 | 0.0302 | 0.0336 | 0.0313 | 0.0297 | 0.0243 |
| 0.0071 | 0.0056 | 0.0043 | 0.0061 | 0.0020 | 0.0946 | 0.0896 | 0.0921 | 0.0895 | 0.0908 | 0.0899 | 0.0902 | 0.0412 | 0.0408 | 0.0404 | 0.0406 | 0.0455 | 0.0451 | 0.0407 | 0.0366 |
| 0.0062 | 0.0057 | 0.0029 | 0.0057 | 0.0035 | 0.0936 | 0.0886 | 0.0912 | 0.0886 | 0.0898 | 0.0889 | 0.0891 | 0.0408 | 0.0402 | 0.0400 | 0.0402 | 0.0451 | 0.0445 | 0.0403 | 0.0359 |
| 0.0077 | 0.0086 | 0.0039 | 0.0083 | 0.0051 | 0.0951 | 0.0897 | 0.0925 | 0.0899 | 0.0911 | 0.0902 | 0.0904 | 0.0419 | 0.0416 | 0.0413 | 0.0414 | 0.0467 | 0.0461 | 0.0416 | 0.0364 |
| 0      | 0.0058 | 0.0065 | 0.0050 | 0.0073 | 0.0922 | 0.0872 | 0.0897 | 0.0870 | 0.0883 | 0.0874 | 0.0878 | 0.0393 | 0.0390 | 0.0386 | 0.0388 | 0.0433 | 0.0424 | 0.0388 | 0.0365 |
| 0.0058 | 0      | 0.0067 | 0.0049 | 0.0056 | 0.0931 | 0.0885 | 0.0907 | 0.0882 | 0.0894 | 0.0887 | 0.0889 | 0.0393 | 0.0389 | 0.0386 | 0.0387 | 0.0436 | 0.0432 | 0.0388 | 0.0376 |
| 0.0065 | 0.0067 | 0      | 0.0066 | 0.0047 | 0.0948 | 0.0898 | 0.0923 | 0.0897 | 0.0909 | 0.0901 | 0.0903 | 0.0417 | 0.0414 | 0.0412 | 0.0412 | 0.0463 | 0.0455 | 0.0414 | 0.0365 |
| 0.0050 | 0.0049 | 0.0066 | 0      | 0.0060 | 0.0913 | 0.0865 | 0.0888 | 0.0863 | 0.0875 | 0.0867 | 0.0868 | 0.0386 | 0.0383 | 0.0379 | 0.0381 | 0.0427 | 0.0422 | 0.0382 | 0.0359 |
| 0.0073 | 0.0056 | 0.0047 | 0.0060 | 0      | 0.0936 | 0.0886 | 0.0912 | 0.0886 | 0.0898 | 0.0889 | 0.0892 | 0.0403 | 0.0399 | 0.0395 | 0.0397 | 0.0447 | 0.0443 | 0.0398 | 0.0359 |
| 0.0922 | 0.0931 | 0.0948 | 0.0913 | 0.0936 | 0      | 0.0121 | 0.0085 | 0.0118 | 0.0096 | 0.0102 | 0.0125 | 0.0595 | 0.0584 | 0.0601 | 0.0611 | 0.0541 | 0.0535 | 0.0600 | 0.0701 |
| 0.0872 | 0.0885 | 0.0898 | 0.0865 | 0.0886 | 0.0121 | 0      | 0.0083 | 0.0080 | 0.0069 | 0.0041 | 0.0083 | 0.0562 | 0.0549 | 0.0563 | 0.0577 | 0.0511 | 0.0501 | 0.0565 | 0.0639 |
| 0.0897 | 0.0907 | 0.0923 | 0.0888 | 0.0912 | 0.0085 | 0.0083 | 0      | 0.0058 | 0.0048 | 0.0059 | 0.0063 | 0.0570 | 0.0558 | 0.0572 | 0.0584 | 0.0515 | 0.0509 | 0.0572 | 0.0678 |
| 0.0870 | 0.0882 | 0.0897 | 0.0863 | 0.0886 | 0.0118 | 0.0080 | 0.0058 | 0      | 0.0034 | 0.0051 | 0.0061 | 0.0547 | 0.0535 | 0.0547 | 0.0560 | 0.0493 | 0.0481 | 0.0548 | 0.0655 |

|        |        |        |        |        |        |        |        |        |        |        |        |        |        |        |        |        |        |        |        |
|--------|--------|--------|--------|--------|--------|--------|--------|--------|--------|--------|--------|--------|--------|--------|--------|--------|--------|--------|--------|
| 0.0883 | 0.0894 | 0.0909 | 0.0875 | 0.0898 | 0.0096 | 0.0069 | 0.0048 | 0.0034 | 0      | 0.0040 | 0.0063 | 0.0562 | 0.0550 | 0.0564 | 0.0576 | 0.0507 | 0.0496 | 0.0564 | 0.0662 |
| 0.0874 | 0.0887 | 0.0901 | 0.0867 | 0.0889 | 0.0102 | 0.0041 | 0.0059 | 0.0051 | 0.0040 | 0      | 0.0076 | 0.0557 | 0.0545 | 0.0559 | 0.0572 | 0.0504 | 0.0494 | 0.0560 | 0.0652 |
| 0.0878 | 0.0889 | 0.0903 | 0.0868 | 0.0892 | 0.0125 | 0.0083 | 0.0063 | 0.0061 | 0.0063 | 0.0076 | 0      | 0.0556 | 0.0543 | 0.0556 | 0.0570 | 0.0506 | 0.0496 | 0.0559 | 0.0656 |
| 0.0393 | 0.0393 | 0.0417 | 0.0386 | 0.0403 | 0.0595 | 0.0562 | 0.0570 | 0.0547 | 0.0562 | 0.0557 | 0.0556 | 0      | 0.0045 | 0.0044 | 0.0026 | 0.0084 | 0.0122 | 0.0035 | 0.0381 |
| 0.0390 | 0.0389 | 0.0414 | 0.0383 | 0.0399 | 0.0584 | 0.0549 | 0.0558 | 0.0535 | 0.0550 | 0.0545 | 0.0543 | 0.0045 | 0      | 0.0045 | 0.0054 | 0.0077 | 0.0113 | 0.0040 | 0.0361 |
| 0.0386 | 0.0386 | 0.0412 | 0.0379 | 0.0395 | 0.0601 | 0.0563 | 0.0572 | 0.0547 | 0.0564 | 0.0559 | 0.0556 | 0.0044 | 0.0045 | 0      | 0.0034 | 0.0092 | 0.0125 | 0.0029 | 0.0377 |
| 0.0388 | 0.0387 | 0.0412 | 0.0381 | 0.0397 | 0.0611 | 0.0577 | 0.0584 | 0.0560 | 0.0576 | 0.0572 | 0.0570 | 0.0026 | 0.0054 | 0.0034 | 0      | 0.0098 | 0.0133 | 0.0031 | 0.0390 |
| 0.0433 | 0.0436 | 0.0463 | 0.0427 | 0.0447 | 0.0541 | 0.0511 | 0.0515 | 0.0493 | 0.0507 | 0.0504 | 0.0506 | 0.0084 | 0.0077 | 0.0092 | 0.0098 | 0      | 0.0089 | 0.0080 | 0.0393 |
| 0.0424 | 0.0432 | 0.0455 | 0.0422 | 0.0443 | 0.0535 | 0.0501 | 0.0509 | 0.0481 | 0.0496 | 0.0494 | 0.0496 | 0.0122 | 0.0113 | 0.0125 | 0.0133 | 0.0089 | 0      | 0.0115 | 0.0359 |
| 0.0388 | 0.0388 | 0.0414 | 0.0382 | 0.0398 | 0.0600 | 0.0565 | 0.0572 | 0.0548 | 0.0564 | 0.0560 | 0.0559 | 0.0035 | 0.0040 | 0.0029 | 0.0031 | 0.0080 | 0.0115 | 0      | 0.0379 |
| 0.0365 | 0.0376 | 0.0365 | 0.0359 | 0.0359 | 0.0701 | 0.0639 | 0.0678 | 0.0655 | 0.0662 | 0.0652 | 0.0656 | 0.0381 | 0.0361 | 0.0377 | 0.0390 | 0.0393 | 0.0359 | 0.0379 | 0      |
| 0.0369 | 0.0379 | 0.0365 | 0.0363 | 0.0359 | 0.0718 | 0.0655 | 0.0696 | 0.0673 | 0.0680 | 0.0669 | 0.0673 | 0.0396 | 0.0375 | 0.0392 | 0.0404 | 0.0411 | 0.0379 | 0.0394 | 0.0034 |
| 0.0363 | 0.0375 | 0.0356 | 0.0359 | 0.0354 | 0.0754 | 0.0690 | 0.0732 | 0.0709 | 0.0716 | 0.0704 | 0.0709 | 0.0420 | 0.0402 | 0.0417 | 0.0428 | 0.0440 | 0.0408 | 0.0420 | 0.0068 |
| 0.0375 | 0.0384 | 0.0375 | 0.0367 | 0.0368 | 0.0695 | 0.0636 | 0.0676 | 0.0653 | 0.0660 | 0.0649 | 0.0655 | 0.0392 | 0.0369 | 0.0387 | 0.0401 | 0.0400 | 0.0367 | 0.0389 | 0.0046 |
| 0.0358 | 0.0367 | 0.0356 | 0.0346 | 0.0350 | 0.0687 | 0.0626 | 0.0663 | 0.0639 | 0.0647 | 0.0638 | 0.0637 | 0.0358 | 0.0336 | 0.0352 | 0.0366 | 0.0373 | 0.0338 | 0.0356 | 0.0064 |
| 0.0331 | 0.0339 | 0.0320 | 0.0351 | 0.0326 | 0.1037 | 0.0983 | 0.1014 | 0.0983 | 0.0998 | 0.0988 | 0.0991 | 0.0501 | 0.0515 | 0.0497 | 0.0490 | 0.0570 | 0.0561 | 0.0501 | 0.0530 |
| 0.0340 | 0.0354 | 0.0333 | 0.0361 | 0.0340 | 0.1008 | 0.0953 | 0.0984 | 0.0953 | 0.0968 | 0.0957 | 0.0962 | 0.0482 | 0.0498 | 0.0479 | 0.0472 | 0.0550 | 0.0540 | 0.0483 | 0.0522 |
| 0.0306 | 0.0313 | 0.0296 | 0.0324 | 0.0302 | 0.1016 | 0.0962 | 0.0992 | 0.0961 | 0.0977 | 0.0967 | 0.0968 | 0.0473 | 0.0487 | 0.0469 | 0.0462 | 0.0543 | 0.0536 | 0.0474 | 0.0516 |
| 0.0329 | 0.0332 | 0.0319 | 0.0344 | 0.0325 | 0.1042 | 0.0991 | 0.1018 | 0.0987 | 0.1003 | 0.0994 | 0.0993 | 0.0493 | 0.0508 | 0.0488 | 0.0480 | 0.0565 | 0.0559 | 0.0494 | 0.0555 |
| 0.0325 | 0.0332 | 0.0315 | 0.0341 | 0.0319 | 0.1004 | 0.0950 | 0.0981 | 0.0950 | 0.0965 | 0.0955 | 0.0957 | 0.0468 | 0.0484 | 0.0465 | 0.0458 | 0.0539 | 0.0532 | 0.0470 | 0.0512 |
| 0.0365 | 0.0332 | 0.0343 | 0.0341 | 0.0326 | 0.0963 | 0.0925 | 0.0948 | 0.0924 | 0.0937 | 0.0929 | 0.0923 | 0.0489 | 0.0475 | 0.0476 | 0.0479 | 0.0536 | 0.0549 | 0.0483 | 0.0517 |
| 0.0369 | 0.0332 | 0.0345 | 0.0342 | 0.0328 | 0.0969 | 0.0930 | 0.0953 | 0.0931 | 0.0943 | 0.0935 | 0.0928 | 0.0490 | 0.0478 | 0.0478 | 0.0481 | 0.0540 | 0.0556 | 0.0487 | 0.0519 |
| 0.0387 | 0.0355 | 0.0363 | 0.0361 | 0.0344 | 0.0931 | 0.0892 | 0.0920 | 0.0897 | 0.0908 | 0.0898 | 0.0896 | 0.0486 | 0.0471 | 0.0475 | 0.0479 | 0.0532 | 0.0546 | 0.0483 | 0.0481 |
| 0.0357 | 0.0323 | 0.0332 | 0.0331 | 0.0315 | 0.0972 | 0.0931 | 0.0957 | 0.0934 | 0.0946 | 0.0937 | 0.0932 | 0.0495 | 0.0484 | 0.0484 | 0.0487 | 0.0546 | 0.0560 | 0.0493 | 0.0505 |
| 0.0365 | 0.0332 | 0.0343 | 0.0341 | 0.0326 | 0.0963 | 0.0925 | 0.0948 | 0.0924 | 0.0937 | 0.0929 | 0.0923 | 0.0489 | 0.0475 | 0.0476 | 0.0479 | 0.0536 | 0.0549 | 0.0483 | 0.0517 |

Columns 61 through 74

|        |        |        |        |        |        |        |        |        |        |        |        |        |        |
|--------|--------|--------|--------|--------|--------|--------|--------|--------|--------|--------|--------|--------|--------|
| 0.0569 | 0.0604 | 0.0550 | 0.0523 | 0.0763 | 0.0747 | 0.0733 | 0.0750 | 0.0727 | 0.0627 | 0.0622 | 0.0596 | 0.0628 | 0.0627 |
| 0.0600 | 0.0635 | 0.0581 | 0.0555 | 0.0795 | 0.0780 | 0.0764 | 0.0781 | 0.0758 | 0.0642 | 0.0637 | 0.0609 | 0.0643 | 0.0642 |
| 0.0597 | 0.0632 | 0.0579 | 0.0550 | 0.0786 | 0.0771 | 0.0755 | 0.0771 | 0.0749 | 0.0639 | 0.0633 | 0.0608 | 0.0640 | 0.0639 |
| 0.0586 | 0.0621 | 0.0571 | 0.0545 | 0.0748 | 0.0731 | 0.0718 | 0.0734 | 0.0710 | 0.0613 | 0.0608 | 0.0580 | 0.0614 | 0.0613 |
| 0.0590 | 0.0625 | 0.0573 | 0.0546 | 0.0784 | 0.0766 | 0.0754 | 0.0771 | 0.0747 | 0.0656 | 0.0650 | 0.0625 | 0.0657 | 0.0656 |
| 0.0622 | 0.0661 | 0.0600 | 0.0579 | 0.0839 | 0.0822 | 0.0807 | 0.0826 | 0.0803 | 0.0667 | 0.0666 | 0.0638 | 0.0674 | 0.0667 |
| 0.0582 | 0.0615 | 0.0566 | 0.0535 | 0.0810 | 0.0787 | 0.0782 | 0.0801 | 0.0773 | 0.0728 | 0.0725 | 0.0700 | 0.0730 | 0.0728 |
| 0.0658 | 0.0695 | 0.0638 | 0.0614 | 0.0869 | 0.0848 | 0.0840 | 0.0858 | 0.0833 | 0.0753 | 0.0753 | 0.0729 | 0.0760 | 0.0753 |
| 0.0521 | 0.0556 | 0.0504 | 0.0474 | 0.0723 | 0.0702 | 0.0695 | 0.0714 | 0.0689 | 0.0650 | 0.0653 | 0.0636 | 0.0660 | 0.0650 |
| 0.0583 | 0.0618 | 0.0563 | 0.0536 | 0.0788 | 0.0768 | 0.0759 | 0.0777 | 0.0752 | 0.0683 | 0.0683 | 0.0659 | 0.0688 | 0.0683 |
| 0.0253 | 0.0261 | 0.0259 | 0.0242 | 0.0380 | 0.0375 | 0.0355 | 0.0388 | 0.0356 | 0.0384 | 0.0380 | 0.0368 | 0.0371 | 0.0384 |
| 0.0244 | 0.0252 | 0.0252 | 0.0235 | 0.0372 | 0.0367 | 0.0349 | 0.0383 | 0.0349 | 0.0376 | 0.0375 | 0.0359 | 0.0365 | 0.0376 |
| 0.0244 | 0.0251 | 0.0251 | 0.0236 | 0.0376 | 0.0371 | 0.0353 | 0.0388 | 0.0352 | 0.0385 | 0.0383 | 0.0367 | 0.0373 | 0.0385 |
| 0.0253 | 0.0260 | 0.0259 | 0.0241 | 0.0374 | 0.0369 | 0.0350 | 0.0383 | 0.0350 | 0.0380 | 0.0377 | 0.0363 | 0.0367 | 0.0380 |
| 0.0239 | 0.0246 | 0.0247 | 0.0231 | 0.0378 | 0.0373 | 0.0355 | 0.0389 | 0.0355 | 0.0382 | 0.0379 | 0.0364 | 0.0370 | 0.0382 |
| 0.0247 | 0.0254 | 0.0255 | 0.0238 | 0.0371 | 0.0366 | 0.0347 | 0.0380 | 0.0347 | 0.0377 | 0.0374 | 0.0360 | 0.0364 | 0.0377 |
| 0.0246 | 0.0253 | 0.0253 | 0.0237 | 0.0378 | 0.0374 | 0.0355 | 0.0388 | 0.0355 | 0.0382 | 0.0379 | 0.0365 | 0.0370 | 0.0382 |
| 0.0244 | 0.0252 | 0.0251 | 0.0235 | 0.0379 | 0.0374 | 0.0356 | 0.0390 | 0.0356 | 0.0379 | 0.0377 | 0.0362 | 0.0367 | 0.0379 |
| 0.0288 | 0.0297 | 0.0291 | 0.0263 | 0.0353 | 0.0350 | 0.0323 | 0.0351 | 0.0328 | 0.0343 | 0.0342 | 0.0339 | 0.0336 | 0.0343 |
| 0.1559 | 0.1565 | 0.1567 | 0.1552 | 0.1557 | 0.1559 | 0.1549 | 0.1547 | 0.1554 | 0.1559 | 0.1559 | 0.1558 | 0.1561 | 0.1559 |
| 0.1242 | 0.1244 | 0.1242 | 0.1228 | 0.1204 | 0.1208 | 0.1194 | 0.1191 | 0.1201 | 0.1216 | 0.1216 | 0.1221 | 0.1217 | 0.1216 |
| 0.1219 | 0.1223 | 0.1218 | 0.1205 | 0.1198 | 0.1201 | 0.1187 | 0.1184 | 0.1194 | 0.1200 | 0.1201 | 0.1206 | 0.1203 | 0.1200 |
| 0.1168 | 0.1169 | 0.1170 | 0.1155 | 0.1111 | 0.1116 | 0.1102 | 0.1097 | 0.1109 | 0.1131 | 0.1131 | 0.1137 | 0.1131 | 0.1131 |
| 0.1203 | 0.1205 | 0.1204 | 0.1191 | 0.1164 | 0.1167 | 0.1154 | 0.1152 | 0.1161 | 0.1176 | 0.1176 | 0.1179 | 0.1177 | 0.1176 |



|        |        |        |        |        |        |        |        |        |        |        |        |        |        |
|--------|--------|--------|--------|--------|--------|--------|--------|--------|--------|--------|--------|--------|--------|
| 0.1207 | 0.1208 | 0.1208 | 0.1193 | 0.1157 | 0.1163 | 0.1148 | 0.1143 | 0.1156 | 0.1167 | 0.1168 | 0.1175 | 0.1169 | 0.1167 |
| 0.1270 | 0.1271 | 0.1271 | 0.1259 | 0.1234 | 0.1238 | 0.1225 | 0.1221 | 0.1232 | 0.1246 | 0.1245 | 0.1250 | 0.1246 | 0.1246 |
| 0.1217 | 0.1216 | 0.1219 | 0.1205 | 0.1161 | 0.1166 | 0.1152 | 0.1147 | 0.1161 | 0.1180 | 0.1180 | 0.1188 | 0.1181 | 0.1180 |
| 0.1231 | 0.1234 | 0.1230 | 0.1217 | 0.1197 | 0.1202 | 0.1187 | 0.1182 | 0.1194 | 0.1192 | 0.1192 | 0.1199 | 0.1195 | 0.1192 |
| 0.0255 | 0.0276 | 0.0243 | 0.0202 | 0.0451 | 0.0452 | 0.0420 | 0.0445 | 0.0431 | 0.0333 | 0.0342 | 0.0336 | 0.0337 | 0.0333 |
| 0.0247 | 0.0269 | 0.0233 | 0.0193 | 0.0462 | 0.0462 | 0.0432 | 0.0457 | 0.0442 | 0.0344 | 0.0354 | 0.0346 | 0.0349 | 0.0344 |
| 0.0239 | 0.0267 | 0.0221 | 0.0185 | 0.0483 | 0.0482 | 0.0453 | 0.0479 | 0.0461 | 0.0352 | 0.0362 | 0.0349 | 0.0359 | 0.0352 |
| 0.0230 | 0.0257 | 0.0213 | 0.0176 | 0.0478 | 0.0475 | 0.0449 | 0.0477 | 0.0458 | 0.0366 | 0.0378 | 0.0365 | 0.0374 | 0.0366 |
| 0.0265 | 0.0286 | 0.0251 | 0.0212 | 0.0455 | 0.0455 | 0.0423 | 0.0447 | 0.0434 | 0.0331 | 0.0340 | 0.0335 | 0.0336 | 0.0331 |
| 0.0261 | 0.0281 | 0.0249 | 0.0208 | 0.0447 | 0.0448 | 0.0416 | 0.0440 | 0.0427 | 0.0331 | 0.0339 | 0.0335 | 0.0335 | 0.0331 |
| 0.0255 | 0.0276 | 0.0243 | 0.0202 | 0.0449 | 0.0449 | 0.0418 | 0.0443 | 0.0428 | 0.0337 | 0.0346 | 0.0339 | 0.0341 | 0.0337 |
| 0.0264 | 0.0284 | 0.0253 | 0.0211 | 0.0443 | 0.0444 | 0.0412 | 0.0435 | 0.0422 | 0.0331 | 0.0338 | 0.0334 | 0.0334 | 0.0331 |
| 0.0251 | 0.0273 | 0.0240 | 0.0198 | 0.0448 | 0.0448 | 0.0417 | 0.0442 | 0.0427 | 0.0340 | 0.0348 | 0.0341 | 0.0343 | 0.0340 |
| 0.0366 | 0.0359 | 0.0376 | 0.0359 | 0.0329 | 0.0343 | 0.0306 | 0.0329 | 0.0323 | 0.0342 | 0.0343 | 0.0360 | 0.0331 | 0.0342 |
| 0.0359 | 0.0353 | 0.0367 | 0.0349 | 0.0333 | 0.0347 | 0.0308 | 0.0331 | 0.0327 | 0.0326 | 0.0329 | 0.0348 | 0.0317 | 0.0326 |
| 0.0362 | 0.0352 | 0.0375 | 0.0357 | 0.0302 | 0.0315 | 0.0280 | 0.0305 | 0.0297 | 0.0342 | 0.0342 | 0.0356 | 0.0326 | 0.0342 |
| 0.0369 | 0.0363 | 0.0375 | 0.0358 | 0.0331 | 0.0340 | 0.0306 | 0.0329 | 0.0325 | 0.0365 | 0.0369 | 0.0387 | 0.0357 | 0.0365 |
| 0.0379 | 0.0375 | 0.0384 | 0.0367 | 0.0339 | 0.0354 | 0.0313 | 0.0332 | 0.0332 | 0.0332 | 0.0332 | 0.0355 | 0.0323 | 0.0332 |
| 0.0365 | 0.0356 | 0.0375 | 0.0356 | 0.0320 | 0.0333 | 0.0296 | 0.0319 | 0.0315 | 0.0343 | 0.0345 | 0.0363 | 0.0332 | 0.0343 |
| 0.0363 | 0.0359 | 0.0367 | 0.0346 | 0.0351 | 0.0361 | 0.0324 | 0.0344 | 0.0341 | 0.0341 | 0.0342 | 0.0361 | 0.0331 | 0.0341 |
| 0.0359 | 0.0354 | 0.0368 | 0.0350 | 0.0326 | 0.0340 | 0.0302 | 0.0325 | 0.0319 | 0.0326 | 0.0328 | 0.0344 | 0.0315 | 0.0326 |
| 0.0718 | 0.0754 | 0.0695 | 0.0687 | 0.1037 | 0.1008 | 0.1016 | 0.1042 | 0.1004 | 0.0963 | 0.0969 | 0.0931 | 0.0972 | 0.0963 |
| 0.0655 | 0.0690 | 0.0636 | 0.0626 | 0.0983 | 0.0953 | 0.0962 | 0.0991 | 0.0950 | 0.0925 | 0.0930 | 0.0892 | 0.0931 | 0.0925 |
| 0.0696 | 0.0732 | 0.0676 | 0.0663 | 0.1014 | 0.0984 | 0.0992 | 0.1018 | 0.0981 | 0.0948 | 0.0953 | 0.0920 | 0.0957 | 0.0948 |
| 0.0673 | 0.0709 | 0.0653 | 0.0639 | 0.0983 | 0.0953 | 0.0961 | 0.0987 | 0.0950 | 0.0924 | 0.0931 | 0.0897 | 0.0934 | 0.0924 |
| 0.0680 | 0.0716 | 0.0660 | 0.0647 | 0.0998 | 0.0968 | 0.0977 | 0.1003 | 0.0965 | 0.0937 | 0.0943 | 0.0908 | 0.0946 | 0.0937 |

|        |        |        |        |        |        |        |        |        |        |        |        |        |        |
|--------|--------|--------|--------|--------|--------|--------|--------|--------|--------|--------|--------|--------|--------|
| 0.0669 | 0.0704 | 0.0649 | 0.0638 | 0.0988 | 0.0957 | 0.0967 | 0.0994 | 0.0955 | 0.0929 | 0.0935 | 0.0898 | 0.0937 | 0.0929 |
| 0.0673 | 0.0709 | 0.0655 | 0.0637 | 0.0991 | 0.0962 | 0.0968 | 0.0993 | 0.0957 | 0.0923 | 0.0928 | 0.0896 | 0.0932 | 0.0923 |
| 0.0396 | 0.0420 | 0.0392 | 0.0358 | 0.0501 | 0.0482 | 0.0473 | 0.0493 | 0.0468 | 0.0489 | 0.0490 | 0.0486 | 0.0495 | 0.0489 |
| 0.0375 | 0.0402 | 0.0369 | 0.0336 | 0.0515 | 0.0498 | 0.0487 | 0.0508 | 0.0484 | 0.0475 | 0.0478 | 0.0471 | 0.0484 | 0.0475 |
| 0.0392 | 0.0417 | 0.0387 | 0.0352 | 0.0497 | 0.0479 | 0.0469 | 0.0488 | 0.0465 | 0.0476 | 0.0478 | 0.0475 | 0.0484 | 0.0476 |
| 0.0404 | 0.0428 | 0.0401 | 0.0366 | 0.0490 | 0.0472 | 0.0462 | 0.0480 | 0.0458 | 0.0479 | 0.0481 | 0.0479 | 0.0487 | 0.0479 |
| 0.0411 | 0.0440 | 0.0400 | 0.0373 | 0.0570 | 0.0550 | 0.0543 | 0.0565 | 0.0539 | 0.0536 | 0.0540 | 0.0532 | 0.0546 | 0.0536 |
| 0.0379 | 0.0408 | 0.0367 | 0.0338 | 0.0561 | 0.0540 | 0.0536 | 0.0559 | 0.0532 | 0.0549 | 0.0556 | 0.0546 | 0.0560 | 0.0549 |
| 0.0394 | 0.0420 | 0.0389 | 0.0356 | 0.0501 | 0.0483 | 0.0474 | 0.0494 | 0.0470 | 0.0483 | 0.0487 | 0.0483 | 0.0493 | 0.0483 |
| 0.0034 | 0.0068 | 0.0046 | 0.0064 | 0.0530 | 0.0522 | 0.0516 | 0.0555 | 0.0512 | 0.0517 | 0.0519 | 0.0481 | 0.0505 | 0.0517 |
| 0      | 0.0051 | 0.0052 | 0.0077 | 0.0525 | 0.0519 | 0.0512 | 0.0551 | 0.0508 | 0.0509 | 0.0510 | 0.0469 | 0.0495 | 0.0509 |
| 0.0051 | 0      | 0.0090 | 0.0112 | 0.0508 | 0.0502 | 0.0498 | 0.0537 | 0.0492 | 0.0522 | 0.0521 | 0.0482 | 0.0504 | 0.0522 |
| 0.0052 | 0.0090 | 0      | 0.0076 | 0.0545 | 0.0539 | 0.0530 | 0.0569 | 0.0527 | 0.0505 | 0.0508 | 0.0466 | 0.0494 | 0.0505 |
| 0.0077 | 0.0112 | 0.0076 | 0      | 0.0525 | 0.0518 | 0.0507 | 0.0542 | 0.0505 | 0.0483 | 0.0485 | 0.0452 | 0.0474 | 0.0483 |
| 0.0525 | 0.0508 | 0.0545 | 0.0525 | 0      | 0.0054 | 0.0044 | 0.0074 | 0.0039 | 0.0475 | 0.0474 | 0.0479 | 0.0449 | 0.0475 |
| 0.0519 | 0.0502 | 0.0539 | 0.0518 | 0.0054 | 0      | 0.0072 | 0.0102 | 0.0052 | 0.0495 | 0.0496 | 0.0497 | 0.0471 | 0.0495 |
| 0.0512 | 0.0498 | 0.0530 | 0.0507 | 0.0044 | 0.0072 | 0      | 0.0051 | 0.0039 | 0.0439 | 0.0438 | 0.0448 | 0.0415 | 0.0439 |
| 0.0551 | 0.0537 | 0.0569 | 0.0542 | 0.0074 | 0.0102 | 0.0051 | 0      | 0.0075 | 0.0448 | 0.0446 | 0.0464 | 0.0425 | 0.0448 |
| 0.0508 | 0.0492 | 0.0527 | 0.0505 | 0.0039 | 0.0052 | 0.0039 | 0.0075 | 0      | 0.0461 | 0.0459 | 0.0462 | 0.0434 | 0.0461 |
| 0.0509 | 0.0522 | 0.0505 | 0.0483 | 0.0475 | 0.0495 | 0.0439 | 0.0448 | 0.0461 | 0      | 0.0058 | 0.0111 | 0.0076 | 0      |
| 0.0510 | 0.0521 | 0.0508 | 0.0485 | 0.0474 | 0.0496 | 0.0438 | 0.0446 | 0.0459 | 0.0058 | 0      | 0.0101 | 0.0051 | 0.0058 |
| 0.0469 | 0.0482 | 0.0466 | 0.0452 | 0.0479 | 0.0497 | 0.0448 | 0.0464 | 0.0462 | 0.0111 | 0.0101 | 0      | 0.0078 | 0.0111 |
| 0.0495 | 0.0504 | 0.0494 | 0.0474 | 0.0449 | 0.0471 | 0.0415 | 0.0425 | 0.0434 | 0.0076 | 0.0051 | 0.0078 | 0      | 0.0076 |
| 0.0509 | 0.0522 | 0.0505 | 0.0483 | 0.0475 | 0.0495 | 0.0439 | 0.0448 | 0.0461 | 0      | 0.0058 | 0.0111 | 0.0076 | 0      |

Table8 The similarity/dissimilarity matrix of 48 Hepatitis E Viruses

Columns 1 through 22

|        |        |        |        |        |        |        |        |        |        |        |        |        |        |        |        |        |        |        |        |        |        |
|--------|--------|--------|--------|--------|--------|--------|--------|--------|--------|--------|--------|--------|--------|--------|--------|--------|--------|--------|--------|--------|--------|
| 0      | 0.0042 | 0.0085 | 0.0060 | 0.0084 | 0.0058 | 0.0044 | 0.0064 | 0.0069 | 0.0054 | 0.0061 | 0.0052 | 0.0045 | 0.0071 | 0.0104 | 0.0070 | 0.0257 | 0.0386 | 0.0335 | 0.0339 | 0.0309 | 0.0423 |
| 0.0042 | 0      | 0.0080 | 0.0050 | 0.0072 | 0.0038 | 0.0060 | 0.0083 | 0.0105 | 0.0064 | 0.0053 | 0.0064 | 0.0048 | 0.0086 | 0.0110 | 0.0083 | 0.0278 | 0.0404 | 0.0354 | 0.0356 | 0.0327 | 0.0442 |
| 0.0085 | 0.0080 | 0      | 0.0056 | 0.0056 | 0.0077 | 0.0081 | 0.0061 | 0.0106 | 0.0079 | 0.0042 | 0.0081 | 0.0061 | 0.0059 | 0.0082 | 0.0059 | 0.0215 | 0.0353 | 0.0297 | 0.0299 | 0.0275 | 0.0395 |
| 0.0060 | 0.0050 | 0.0056 | 0      | 0.0056 | 0.0062 | 0.0054 | 0.0061 | 0.0096 | 0.0054 | 0.0029 | 0.0053 | 0.0045 | 0.0066 | 0.0097 | 0.0059 | 0.0253 | 0.0385 | 0.0331 | 0.0334 | 0.0307 | 0.0425 |
| 0.0084 | 0.0072 | 0.0056 | 0.0056 | 0      | 0.0069 | 0.0075 | 0.0068 | 0.0116 | 0.0079 | 0.0035 | 0.0079 | 0.0052 | 0.0078 | 0.0102 | 0.0075 | 0.0248 | 0.0386 | 0.0331 | 0.0331 | 0.0310 | 0.0428 |
| 0.0058 | 0.0038 | 0.0077 | 0.0062 | 0.0069 | 0      | 0.0074 | 0.0091 | 0.0117 | 0.0075 | 0.0059 | 0.0076 | 0.0059 | 0.0080 | 0.0120 | 0.0097 | 0.0274 | 0.0403 | 0.0351 | 0.0354 | 0.0324 | 0.0441 |
| 0.0044 | 0.0060 | 0.0081 | 0.0054 | 0.0075 | 0.0074 | 0      | 0.0058 | 0.0067 | 0.0035 | 0.0059 | 0.0033 | 0.0031 | 0.0083 | 0.0117 | 0.0071 | 0.0253 | 0.0399 | 0.0343 | 0.0347 | 0.0322 | 0.0439 |
| 0.0064 | 0.0083 | 0.0061 | 0.0061 | 0.0068 | 0.0091 | 0.0058 | 0      | 0.0054 | 0.0055 | 0.0050 | 0.0055 | 0.0051 | 0.0048 | 0.0089 | 0.0034 | 0.0216 | 0.0356 | 0.0300 | 0.0302 | 0.0280 | 0.0395 |
| 0.0069 | 0.0105 | 0.0106 | 0.0096 | 0.0116 | 0.0117 | 0.0067 | 0.0054 | 0      | 0.0068 | 0.0095 | 0.0066 | 0.0079 | 0.0081 | 0.0120 | 0.0072 | 0.0222 | 0.0364 | 0.0309 | 0.0313 | 0.0289 | 0.0400 |
| 0.0054 | 0.0064 | 0.0079 | 0.0054 | 0.0079 | 0.0075 | 0.0035 | 0.0055 | 0.0068 | 0      | 0.0059 | 0.0006 | 0.0043 | 0.0078 | 0.0128 | 0.0071 | 0.0258 | 0.0404 | 0.0348 | 0.0351 | 0.0326 | 0.0442 |
| 0.0061 | 0.0053 | 0.0042 | 0.0029 | 0.0035 | 0.0059 | 0.0059 | 0.0050 | 0.0095 | 0.0059 | 0      | 0.0059 | 0.0036 | 0.0059 | 0.0086 | 0.0053 | 0.0241 | 0.0375 | 0.0321 | 0.0322 | 0.0297 | 0.0415 |
| 0.0052 | 0.0064 | 0.0081 | 0.0053 | 0.0079 | 0.0076 | 0.0033 | 0.0055 | 0.0066 | 0.0006 | 0.0059 | 0      | 0.0043 | 0.0078 | 0.0128 | 0.0071 | 0.0259 | 0.0405 | 0.0348 | 0.0352 | 0.0326 | 0.0443 |
| 0.0045 | 0.0048 | 0.0061 | 0.0045 | 0.0052 | 0.0059 | 0.0031 | 0.0051 | 0.0079 | 0.0043 | 0.0036 | 0.0043 | 0      | 0.0074 | 0.0102 | 0.0064 | 0.0246 | 0.0389 | 0.0334 | 0.0336 | 0.0312 | 0.0430 |
| 0.0071 | 0.0086 | 0.0059 | 0.0066 | 0.0078 | 0.0080 | 0.0083 | 0.0048 | 0.0081 | 0.0078 | 0.0059 | 0.0078 | 0.0074 | 0      | 0.0087 | 0.0055 | 0.0216 | 0.0343 | 0.0288 | 0.0292 | 0.0264 | 0.0379 |
| 0.0104 | 0.0110 | 0.0082 | 0.0097 | 0.0102 | 0.0120 | 0.0117 | 0.0089 | 0.0120 | 0.0128 | 0.0086 | 0.0128 | 0.0102 | 0.0087 | 0      | 0.0070 | 0.0200 | 0.0303 | 0.0257 | 0.0256 | 0.0230 | 0.0344 |
| 0.0070 | 0.0083 | 0.0059 | 0.0059 | 0.0075 | 0.0097 | 0.0071 | 0.0034 | 0.0072 | 0.0071 | 0.0053 | 0.0071 | 0.0064 | 0.0055 | 0.0070 | 0      | 0.0219 | 0.0347 | 0.0295 | 0.0295 | 0.0272 | 0.0385 |
| 0.0257 | 0.0278 | 0.0215 | 0.0253 | 0.0248 | 0.0274 | 0.0253 | 0.0216 | 0.0222 | 0.0258 | 0.0241 | 0.0259 | 0.0246 | 0.0216 | 0.0200 | 0.0219 | 0      | 0.0211 | 0.0141 | 0.0148 | 0.0150 | 0.0257 |
| 0.0386 | 0.0404 | 0.0353 | 0.0385 | 0.0386 | 0.0403 | 0.0399 | 0.0356 | 0.0364 | 0.0404 | 0.0375 | 0.0405 | 0.0389 | 0.0343 | 0.0303 | 0.0347 | 0.0211 | 0      | 0.0077 | 0.0072 | 0.0084 | 0.0061 |
| 0.0335 | 0.0354 | 0.0297 | 0.0331 | 0.0331 | 0.0351 | 0.0343 | 0.0300 | 0.0309 | 0.0348 | 0.0321 | 0.0348 | 0.0334 | 0.0288 | 0.0257 | 0.0295 | 0.0141 | 0.0077 | 0      | 0.0035 | 0.0050 | 0.0125 |
| 0.0339 | 0.0356 | 0.0299 | 0.0334 | 0.0331 | 0.0354 | 0.0347 | 0.0302 | 0.0313 | 0.0351 | 0.0322 | 0.0352 | 0.0336 | 0.0292 | 0.0256 | 0.0295 | 0.0148 | 0.0072 | 0.0035 | 0      | 0.0058 | 0.0121 |
| 0.0309 | 0.0327 | 0.0275 | 0.0307 | 0.0310 | 0.0324 | 0.0322 | 0.0280 | 0.0289 | 0.0326 | 0.0297 | 0.0326 | 0.0312 | 0.0264 | 0.0230 | 0.0272 | 0.0150 | 0.0084 | 0.0050 | 0.0058 | 0      | 0.0127 |
| 0.0423 | 0.0442 | 0.0395 | 0.0425 | 0.0428 | 0.0441 | 0.0439 | 0.0395 | 0.0400 | 0.0442 | 0.0415 | 0.0443 | 0.0430 | 0.0379 | 0.0344 | 0.0385 | 0.0257 | 0.0061 | 0.0125 | 0.0121 | 0.0127 | 0      |
| 0.0349 | 0.0371 | 0.0324 | 0.0352 | 0.0359 | 0.0374 | 0.0360 | 0.0320 | 0.0320 | 0.0366 | 0.0344 | 0.0366 | 0.0354 | 0.0312 | 0.0274 | 0.0311 | 0.0177 | 0.0073 | 0.0077 | 0.0080 | 0.0078 | 0.0106 |
| 0.0337 | 0.0360 | 0.0313 | 0.0343 | 0.0350 | 0.0357 | 0.0350 | 0.0312 | 0.0310 | 0.0355 | 0.0335 | 0.0356 | 0.0344 | 0.0298 | 0.0271 | 0.0307 | 0.0169 | 0.0095 | 0.0074 | 0.0098 | 0.0069 | 0.0122 |

|        |        |        |        |        |        |        |        |        |        |        |        |        |        |        |        |        |        |        |        |        |        |
|--------|--------|--------|--------|--------|--------|--------|--------|--------|--------|--------|--------|--------|--------|--------|--------|--------|--------|--------|--------|--------|--------|
| 0.0347 | 0.0370 | 0.0324 | 0.0353 | 0.0360 | 0.0366 | 0.0360 | 0.0322 | 0.0320 | 0.0365 | 0.0345 | 0.0365 | 0.0354 | 0.0306 | 0.0283 | 0.0318 | 0.0180 | 0.0099 | 0.0082 | 0.0106 | 0.0079 | 0.0119 |
| 0.0364 | 0.0383 | 0.0329 | 0.0363 | 0.0366 | 0.0380 | 0.0376 | 0.0331 | 0.0336 | 0.0377 | 0.0354 | 0.0378 | 0.0367 | 0.0315 | 0.0290 | 0.0324 | 0.0184 | 0.0069 | 0.0063 | 0.0069 | 0.0073 | 0.0087 |
| 0.0323 | 0.0342 | 0.0294 | 0.0325 | 0.0332 | 0.0338 | 0.0337 | 0.0299 | 0.0303 | 0.0342 | 0.0317 | 0.0342 | 0.0329 | 0.0282 | 0.0253 | 0.0293 | 0.0166 | 0.0096 | 0.0070 | 0.0093 | 0.0050 | 0.0131 |
| 0.0323 | 0.0343 | 0.0290 | 0.0322 | 0.0329 | 0.0341 | 0.0334 | 0.0292 | 0.0296 | 0.0336 | 0.0314 | 0.0337 | 0.0326 | 0.0278 | 0.0252 | 0.0286 | 0.0150 | 0.0093 | 0.0051 | 0.0073 | 0.0045 | 0.0128 |
| 0.0331 | 0.0350 | 0.0300 | 0.0332 | 0.0337 | 0.0345 | 0.0345 | 0.0307 | 0.0312 | 0.0350 | 0.0324 | 0.0351 | 0.0336 | 0.0289 | 0.0258 | 0.0300 | 0.0170 | 0.0086 | 0.0064 | 0.0086 | 0.0047 | 0.0123 |
| 0.0328 | 0.0346 | 0.0298 | 0.0329 | 0.0335 | 0.0342 | 0.0342 | 0.0304 | 0.0308 | 0.0346 | 0.0321 | 0.0347 | 0.0333 | 0.0286 | 0.0256 | 0.0297 | 0.0169 | 0.0091 | 0.0068 | 0.0091 | 0.0049 | 0.0127 |
| 0.0327 | 0.0346 | 0.0297 | 0.0329 | 0.0334 | 0.0341 | 0.0341 | 0.0303 | 0.0307 | 0.0346 | 0.0320 | 0.0346 | 0.0332 | 0.0285 | 0.0255 | 0.0297 | 0.0168 | 0.0091 | 0.0067 | 0.0089 | 0.0048 | 0.0126 |
| 0.0436 | 0.0459 | 0.0406 | 0.0438 | 0.0441 | 0.0453 | 0.0447 | 0.0403 | 0.0403 | 0.0448 | 0.0429 | 0.0449 | 0.0441 | 0.0386 | 0.0371 | 0.0400 | 0.0243 | 0.0127 | 0.0135 | 0.0146 | 0.0156 | 0.0108 |
| 0.0353 | 0.0377 | 0.0331 | 0.0360 | 0.0367 | 0.0378 | 0.0365 | 0.0329 | 0.0326 | 0.0373 | 0.0353 | 0.0373 | 0.0360 | 0.0319 | 0.0283 | 0.0321 | 0.0177 | 0.0107 | 0.0104 | 0.0116 | 0.0104 | 0.0129 |
| 0.0337 | 0.0361 | 0.0310 | 0.0340 | 0.0350 | 0.0359 | 0.0349 | 0.0307 | 0.0305 | 0.0350 | 0.0334 | 0.0350 | 0.0344 | 0.0293 | 0.0275 | 0.0302 | 0.0164 | 0.0113 | 0.0086 | 0.0103 | 0.0083 | 0.0128 |
| 0.0377 | 0.0394 | 0.0334 | 0.0368 | 0.0369 | 0.0395 | 0.0384 | 0.0335 | 0.0347 | 0.0384 | 0.0358 | 0.0384 | 0.0375 | 0.0326 | 0.0296 | 0.0326 | 0.0192 | 0.0098 | 0.0095 | 0.0076 | 0.0111 | 0.0120 |
| 0.0395 | 0.0410 | 0.0348 | 0.0383 | 0.0382 | 0.0408 | 0.0403 | 0.0353 | 0.0368 | 0.0401 | 0.0373 | 0.0402 | 0.0392 | 0.0340 | 0.0313 | 0.0343 | 0.0212 | 0.0108 | 0.0111 | 0.0093 | 0.0127 | 0.0123 |
| 0.0402 | 0.0416 | 0.0356 | 0.0390 | 0.0388 | 0.0414 | 0.0410 | 0.0360 | 0.0376 | 0.0409 | 0.0379 | 0.0410 | 0.0398 | 0.0348 | 0.0317 | 0.0351 | 0.0216 | 0.0094 | 0.0104 | 0.0085 | 0.0124 | 0.0112 |
| 0.0459 | 0.0473 | 0.0420 | 0.0454 | 0.0455 | 0.0470 | 0.0475 | 0.0427 | 0.0440 | 0.0474 | 0.0444 | 0.0475 | 0.0462 | 0.0409 | 0.0377 | 0.0417 | 0.0288 | 0.0107 | 0.0160 | 0.0149 | 0.0163 | 0.0081 |
| 0.0469 | 0.0486 | 0.0428 | 0.0464 | 0.0460 | 0.0480 | 0.0481 | 0.0432 | 0.0443 | 0.0480 | 0.0452 | 0.0481 | 0.0469 | 0.0415 | 0.0391 | 0.0426 | 0.0278 | 0.0128 | 0.0160 | 0.0150 | 0.0177 | 0.0108 |
| 0.0464 | 0.0479 | 0.0423 | 0.0458 | 0.0455 | 0.0474 | 0.0478 | 0.0429 | 0.0442 | 0.0477 | 0.0446 | 0.0478 | 0.0465 | 0.0411 | 0.0382 | 0.0421 | 0.0283 | 0.0117 | 0.0160 | 0.0148 | 0.0171 | 0.0098 |
| 0.0394 | 0.0409 | 0.0348 | 0.0382 | 0.0383 | 0.0408 | 0.0402 | 0.0352 | 0.0367 | 0.0400 | 0.0373 | 0.0401 | 0.0391 | 0.0340 | 0.0313 | 0.0342 | 0.0213 | 0.0110 | 0.0111 | 0.0096 | 0.0126 | 0.0123 |
| 0.0394 | 0.0409 | 0.0348 | 0.0382 | 0.0382 | 0.0407 | 0.0401 | 0.0352 | 0.0366 | 0.0399 | 0.0372 | 0.0400 | 0.0391 | 0.0339 | 0.0313 | 0.0342 | 0.0212 | 0.0109 | 0.0110 | 0.0095 | 0.0126 | 0.0123 |
| 0.0473 | 0.0487 | 0.0429 | 0.0465 | 0.0461 | 0.0481 | 0.0486 | 0.0436 | 0.0451 | 0.0484 | 0.0453 | 0.0485 | 0.0472 | 0.0418 | 0.0391 | 0.0429 | 0.0289 | 0.0131 | 0.0168 | 0.0156 | 0.0182 | 0.0115 |
| 0.0467 | 0.0481 | 0.0424 | 0.0459 | 0.0455 | 0.0476 | 0.0480 | 0.0430 | 0.0444 | 0.0478 | 0.0447 | 0.0479 | 0.0466 | 0.0412 | 0.0385 | 0.0422 | 0.0283 | 0.0127 | 0.0163 | 0.0151 | 0.0176 | 0.0111 |
| 0.0395 | 0.0411 | 0.0353 | 0.0385 | 0.0387 | 0.0412 | 0.0403 | 0.0354 | 0.0365 | 0.0402 | 0.0376 | 0.0403 | 0.0393 | 0.0344 | 0.0312 | 0.0343 | 0.0213 | 0.0094 | 0.0106 | 0.0089 | 0.0121 | 0.0109 |
| 0.0498 | 0.0512 | 0.0460 | 0.0493 | 0.0495 | 0.0510 | 0.0512 | 0.0468 | 0.0478 | 0.0514 | 0.0484 | 0.0515 | 0.0501 | 0.0451 | 0.0413 | 0.0457 | 0.0320 | 0.0122 | 0.0185 | 0.0180 | 0.0193 | 0.0093 |
| 0.0454 | 0.0467 | 0.0413 | 0.0446 | 0.0447 | 0.0465 | 0.0467 | 0.0421 | 0.0434 | 0.0468 | 0.0437 | 0.0469 | 0.0455 | 0.0404 | 0.0368 | 0.0410 | 0.0279 | 0.0091 | 0.0146 | 0.0137 | 0.0154 | 0.0080 |
| 0.0446 | 0.0459 | 0.0405 | 0.0438 | 0.0439 | 0.0459 | 0.0459 | 0.0413 | 0.0427 | 0.0461 | 0.0428 | 0.0461 | 0.0446 | 0.0399 | 0.0357 | 0.0401 | 0.0270 | 0.0091 | 0.0148 | 0.0132 | 0.0151 | 0.0090 |

Columns 23 through 44

|        |        |        |        |        |        |        |        |        |        |        |        |        |        |        |        |        |        |        |        |        |        |
|--------|--------|--------|--------|--------|--------|--------|--------|--------|--------|--------|--------|--------|--------|--------|--------|--------|--------|--------|--------|--------|--------|
| 0.0349 | 0.0337 | 0.0347 | 0.0364 | 0.0323 | 0.0323 | 0.0331 | 0.0328 | 0.0327 | 0.0436 | 0.0353 | 0.0337 | 0.0377 | 0.0395 | 0.0402 | 0.0459 | 0.0469 | 0.0464 | 0.0394 | 0.0394 | 0.0473 | 0.0467 |
| 0.0371 | 0.0360 | 0.0370 | 0.0383 | 0.0342 | 0.0343 | 0.0350 | 0.0346 | 0.0346 | 0.0459 | 0.0377 | 0.0361 | 0.0394 | 0.0410 | 0.0416 | 0.0473 | 0.0486 | 0.0479 | 0.0409 | 0.0409 | 0.0487 | 0.0481 |
| 0.0324 | 0.0313 | 0.0324 | 0.0329 | 0.0294 | 0.0290 | 0.0300 | 0.0298 | 0.0297 | 0.0406 | 0.0331 | 0.0310 | 0.0334 | 0.0348 | 0.0356 | 0.0420 | 0.0428 | 0.0423 | 0.0348 | 0.0348 | 0.0429 | 0.0424 |
| 0.0352 | 0.0343 | 0.0353 | 0.0363 | 0.0325 | 0.0322 | 0.0332 | 0.0329 | 0.0329 | 0.0438 | 0.0360 | 0.0340 | 0.0368 | 0.0383 | 0.0390 | 0.0454 | 0.0464 | 0.0458 | 0.0382 | 0.0382 | 0.0465 | 0.0459 |
| 0.0359 | 0.0350 | 0.0360 | 0.0366 | 0.0332 | 0.0329 | 0.0337 | 0.0335 | 0.0334 | 0.0441 | 0.0367 | 0.0350 | 0.0369 | 0.0382 | 0.0388 | 0.0455 | 0.0460 | 0.0455 | 0.0383 | 0.0382 | 0.0461 | 0.0455 |
| 0.0374 | 0.0357 | 0.0366 | 0.0380 | 0.0338 | 0.0341 | 0.0345 | 0.0342 | 0.0341 | 0.0453 | 0.0378 | 0.0359 | 0.0395 | 0.0408 | 0.0414 | 0.0470 | 0.0480 | 0.0474 | 0.0408 | 0.0407 | 0.0481 | 0.0476 |
| 0.0360 | 0.0350 | 0.0360 | 0.0376 | 0.0337 | 0.0334 | 0.0345 | 0.0342 | 0.0341 | 0.0447 | 0.0365 | 0.0349 | 0.0384 | 0.0403 | 0.0410 | 0.0475 | 0.0481 | 0.0478 | 0.0402 | 0.0401 | 0.0486 | 0.0480 |
| 0.0320 | 0.0312 | 0.0322 | 0.0331 | 0.0299 | 0.0292 | 0.0307 | 0.0304 | 0.0303 | 0.0403 | 0.0329 | 0.0307 | 0.0335 | 0.0353 | 0.0360 | 0.0427 | 0.0432 | 0.0429 | 0.0352 | 0.0352 | 0.0436 | 0.0430 |
| 0.0320 | 0.0310 | 0.0320 | 0.0336 | 0.0303 | 0.0296 | 0.0312 | 0.0308 | 0.0307 | 0.0403 | 0.0326 | 0.0305 | 0.0347 | 0.0368 | 0.0376 | 0.0440 | 0.0443 | 0.0442 | 0.0367 | 0.0366 | 0.0451 | 0.0444 |
| 0.0366 | 0.0355 | 0.0365 | 0.0377 | 0.0342 | 0.0336 | 0.0350 | 0.0346 | 0.0346 | 0.0448 | 0.0373 | 0.0350 | 0.0384 | 0.0401 | 0.0409 | 0.0474 | 0.0480 | 0.0477 | 0.0400 | 0.0399 | 0.0484 | 0.0478 |
| 0.0344 | 0.0335 | 0.0345 | 0.0354 | 0.0317 | 0.0314 | 0.0324 | 0.0321 | 0.0320 | 0.0429 | 0.0353 | 0.0334 | 0.0358 | 0.0373 | 0.0379 | 0.0444 | 0.0452 | 0.0446 | 0.0373 | 0.0372 | 0.0453 | 0.0447 |
| 0.0366 | 0.0356 | 0.0365 | 0.0378 | 0.0342 | 0.0337 | 0.0351 | 0.0347 | 0.0346 | 0.0449 | 0.0373 | 0.0350 | 0.0384 | 0.0402 | 0.0410 | 0.0475 | 0.0481 | 0.0478 | 0.0401 | 0.0400 | 0.0485 | 0.0479 |
| 0.0354 | 0.0344 | 0.0354 | 0.0367 | 0.0329 | 0.0326 | 0.0336 | 0.0333 | 0.0332 | 0.0441 | 0.0360 | 0.0344 | 0.0375 | 0.0392 | 0.0398 | 0.0462 | 0.0469 | 0.0465 | 0.0391 | 0.0391 | 0.0472 | 0.0466 |
| 0.0312 | 0.0298 | 0.0306 | 0.0315 | 0.0282 | 0.0278 | 0.0289 | 0.0286 | 0.0285 | 0.0386 | 0.0319 | 0.0293 | 0.0326 | 0.0340 | 0.0348 | 0.0409 | 0.0415 | 0.0411 | 0.0340 | 0.0339 | 0.0418 | 0.0412 |
| 0.0274 | 0.0271 | 0.0283 | 0.0290 | 0.0253 | 0.0252 | 0.0258 | 0.0256 | 0.0255 | 0.0371 | 0.0283 | 0.0275 | 0.0296 | 0.0313 | 0.0317 | 0.0377 | 0.0391 | 0.0382 | 0.0313 | 0.0313 | 0.0391 | 0.0385 |
| 0.0311 | 0.0307 | 0.0318 | 0.0324 | 0.0293 | 0.0286 | 0.0300 | 0.0297 | 0.0297 | 0.0400 | 0.0321 | 0.0302 | 0.0326 | 0.0343 | 0.0351 | 0.0417 | 0.0426 | 0.0421 | 0.0342 | 0.0342 | 0.0429 | 0.0422 |
| 0.0177 | 0.0169 | 0.0180 | 0.0184 | 0.0166 | 0.0150 | 0.0170 | 0.0169 | 0.0168 | 0.0243 | 0.0177 | 0.0164 | 0.0192 | 0.0212 | 0.0216 | 0.0288 | 0.0278 | 0.0283 | 0.0213 | 0.0212 | 0.0289 | 0.0283 |
| 0.0073 | 0.0095 | 0.0099 | 0.0069 | 0.0096 | 0.0093 | 0.0086 | 0.0091 | 0.0091 | 0.0127 | 0.0107 | 0.0113 | 0.0098 | 0.0108 | 0.0094 | 0.0107 | 0.0128 | 0.0117 | 0.0110 | 0.0109 | 0.0131 | 0.0127 |
| 0.0077 | 0.0074 | 0.0082 | 0.0063 | 0.0070 | 0.0051 | 0.0064 | 0.0068 | 0.0067 | 0.0135 | 0.0104 | 0.0086 | 0.0095 | 0.0111 | 0.0104 | 0.0160 | 0.0160 | 0.0160 | 0.0111 | 0.0110 | 0.0168 | 0.0163 |
| 0.0080 | 0.0098 | 0.0106 | 0.0069 | 0.0093 | 0.0073 | 0.0086 | 0.0091 | 0.0089 | 0.0146 | 0.0116 | 0.0103 | 0.0076 | 0.0093 | 0.0085 | 0.0149 | 0.0150 | 0.0148 | 0.0096 | 0.0095 | 0.0156 | 0.0151 |
| 0.0078 | 0.0069 | 0.0079 | 0.0073 | 0.0050 | 0.0045 | 0.0047 | 0.0049 | 0.0048 | 0.0156 | 0.0104 | 0.0083 | 0.0111 | 0.0127 | 0.0124 | 0.0163 | 0.0177 | 0.0171 | 0.0126 | 0.0126 | 0.0182 | 0.0176 |
| 0.0106 | 0.0122 | 0.0119 | 0.0087 | 0.0131 | 0.0128 | 0.0123 | 0.0127 | 0.0126 | 0.0108 | 0.0129 | 0.0128 | 0.0120 | 0.0123 | 0.0112 | 0.0081 | 0.0108 | 0.0098 | 0.0123 | 0.0123 | 0.0115 | 0.0111 |
| 0      | 0.0068 | 0.0080 | 0.0079 | 0.0088 | 0.0072 | 0.0088 | 0.0088 | 0.0087 | 0.0142 | 0.0068 | 0.0079 | 0.0107 | 0.0136 | 0.0132 | 0.0164 | 0.0178 | 0.0175 | 0.0134 | 0.0133 | 0.0189 | 0.0184 |
| 0.0068 | 0      | 0.0018 | 0.0073 | 0.0041 | 0.0050 | 0.0047 | 0.0043 | 0.0043 | 0.0126 | 0.0073 | 0.0055 | 0.0141 | 0.0160 | 0.0156 | 0.0175 | 0.0186 | 0.0186 | 0.0157 | 0.0157 | 0.0199 | 0.0193 |
| 0.0080 | 0.0018 | 0      | 0.0072 | 0.0047 | 0.0057 | 0.0051 | 0.0048 | 0.0048 | 0.0114 | 0.0084 | 0.0057 | 0.0146 | 0.0162 | 0.0158 | 0.0171 | 0.0180 | 0.0182 | 0.0159 | 0.0159 | 0.0194 | 0.0189 |
| 0.0079 | 0.0073 | 0.0072 | 0      | 0.0077 | 0.0057 | 0.0073 | 0.0075 | 0.0075 | 0.0092 | 0.0107 | 0.0062 | 0.0083 | 0.0095 | 0.0092 | 0.0121 | 0.0128 | 0.0128 | 0.0092 | 0.0092 | 0.0140 | 0.0134 |

|        |        |        |        |        |        |        |        |        |        |        |        |        |        |        |        |        |        |        |        |        |        |
|--------|--------|--------|--------|--------|--------|--------|--------|--------|--------|--------|--------|--------|--------|--------|--------|--------|--------|--------|--------|--------|--------|
| 0.0088 | 0.0041 | 0.0047 | 0.0077 | 0      | 0.0044 | 0.0015 | 0.0007 | 0.0008 | 0.0145 | 0.0097 | 0.0073 | 0.0141 | 0.0155 | 0.0151 | 0.0171 | 0.0189 | 0.0184 | 0.0153 | 0.0153 | 0.0196 | 0.0190 |
| 0.0072 | 0.0050 | 0.0057 | 0.0057 | 0.0044 | 0      | 0.0049 | 0.0047 | 0.0047 | 0.0132 | 0.0097 | 0.0049 | 0.0107 | 0.0126 | 0.0126 | 0.0167 | 0.0177 | 0.0175 | 0.0122 | 0.0122 | 0.0186 | 0.0180 |
| 0.0088 | 0.0047 | 0.0051 | 0.0073 | 0.0015 | 0.0049 | 0      | 0.0008 | 0.0008 | 0.0141 | 0.0099 | 0.0080 | 0.0137 | 0.0149 | 0.0143 | 0.0162 | 0.0179 | 0.0173 | 0.0147 | 0.0147 | 0.0185 | 0.0180 |
| 0.0088 | 0.0043 | 0.0048 | 0.0075 | 0.0007 | 0.0047 | 0.0008 | 0      | 0.0003 | 0.0143 | 0.0098 | 0.0076 | 0.0140 | 0.0153 | 0.0148 | 0.0167 | 0.0184 | 0.0179 | 0.0151 | 0.0151 | 0.0191 | 0.0186 |
| 0.0087 | 0.0043 | 0.0048 | 0.0075 | 0.0008 | 0.0047 | 0.0008 | 0.0003 | 0      | 0.0143 | 0.0097 | 0.0077 | 0.0140 | 0.0153 | 0.0148 | 0.0166 | 0.0184 | 0.0179 | 0.0151 | 0.0150 | 0.0190 | 0.0185 |
| 0.0142 | 0.0126 | 0.0114 | 0.0092 | 0.0145 | 0.0132 | 0.0141 | 0.0143 | 0.0143 | 0      | 0.0149 | 0.0114 | 0.0141 | 0.0142 | 0.0138 | 0.0134 | 0.0113 | 0.0133 | 0.0140 | 0.0139 | 0.0139 | 0.0134 |
| 0.0068 | 0.0073 | 0.0084 | 0.0107 | 0.0097 | 0.0097 | 0.0099 | 0.0098 | 0.0097 | 0.0149 | 0      | 0.0087 | 0.0149 | 0.0174 | 0.0171 | 0.0191 | 0.0202 | 0.0203 | 0.0173 | 0.0172 | 0.0217 | 0.0212 |
| 0.0079 | 0.0055 | 0.0057 | 0.0062 | 0.0073 | 0.0049 | 0.0080 | 0.0076 | 0.0077 | 0.0114 | 0.0087 | 0      | 0.0118 | 0.0139 | 0.0144 | 0.0173 | 0.0179 | 0.0182 | 0.0134 | 0.0134 | 0.0195 | 0.0188 |
| 0.0107 | 0.0141 | 0.0146 | 0.0083 | 0.0141 | 0.0107 | 0.0137 | 0.0140 | 0.0140 | 0.0141 | 0.0149 | 0.0118 | 0      | 0.0038 | 0.0049 | 0.0132 | 0.0133 | 0.0128 | 0.0035 | 0.0035 | 0.0137 | 0.0131 |
| 0.0136 | 0.0160 | 0.0162 | 0.0095 | 0.0155 | 0.0126 | 0.0149 | 0.0153 | 0.0153 | 0.0142 | 0.0174 | 0.0139 | 0.0038 | 0      | 0.0027 | 0.0114 | 0.0111 | 0.0105 | 0.0014 | 0.0013 | 0.0110 | 0.0104 |
| 0.0132 | 0.0156 | 0.0158 | 0.0092 | 0.0151 | 0.0126 | 0.0143 | 0.0148 | 0.0148 | 0.0138 | 0.0171 | 0.0144 | 0.0049 | 0.0027 | 0      | 0.0105 | 0.0101 | 0.0094 | 0.0035 | 0.0034 | 0.0099 | 0.0094 |
| 0.0164 | 0.0175 | 0.0171 | 0.0121 | 0.0171 | 0.0167 | 0.0162 | 0.0167 | 0.0166 | 0.0134 | 0.0191 | 0.0173 | 0.0132 | 0.0114 | 0.0105 | 0      | 0.0070 | 0.0039 | 0.0116 | 0.0117 | 0.0058 | 0.0057 |
| 0.0178 | 0.0186 | 0.0180 | 0.0128 | 0.0189 | 0.0177 | 0.0179 | 0.0184 | 0.0184 | 0.0113 | 0.0202 | 0.0179 | 0.0133 | 0.0111 | 0.0101 | 0.0070 | 0      | 0.0038 | 0.0116 | 0.0116 | 0.0035 | 0.0030 |
| 0.0175 | 0.0186 | 0.0182 | 0.0128 | 0.0184 | 0.0175 | 0.0173 | 0.0179 | 0.0179 | 0.0133 | 0.0203 | 0.0182 | 0.0128 | 0.0105 | 0.0094 | 0.0039 | 0.0038 | 0      | 0.0110 | 0.0110 | 0.0022 | 0.0019 |
| 0.0134 | 0.0157 | 0.0159 | 0.0092 | 0.0153 | 0.0122 | 0.0147 | 0.0151 | 0.0151 | 0.0140 | 0.0173 | 0.0134 | 0.0035 | 0.0014 | 0.0035 | 0.0116 | 0.0116 | 0.0110 | 0      | 0.0004 | 0.0116 | 0.0110 |
| 0.0133 | 0.0157 | 0.0159 | 0.0092 | 0.0153 | 0.0122 | 0.0147 | 0.0151 | 0.0150 | 0.0139 | 0.0172 | 0.0134 | 0.0035 | 0.0013 | 0.0034 | 0.0117 | 0.0116 | 0.0110 | 0.0004 | 0      | 0.0116 | 0.0110 |
| 0.0189 | 0.0199 | 0.0194 | 0.0140 | 0.0196 | 0.0186 | 0.0185 | 0.0191 | 0.0190 | 0.0139 | 0.0217 | 0.0195 | 0.0137 | 0.0110 | 0.0099 | 0.0058 | 0.0035 | 0.0022 | 0.0116 | 0.0116 | 0      | 0.0008 |
| 0.0184 | 0.0193 | 0.0189 | 0.0134 | 0.0190 | 0.0180 | 0.0180 | 0.0186 | 0.0185 | 0.0134 | 0.0212 | 0.0188 | 0.0131 | 0.0104 | 0.0094 | 0.0057 | 0.0030 | 0.0019 | 0.0110 | 0.0110 | 0.0008 | 0      |
| 0.0112 | 0.0147 | 0.0150 | 0.0087 | 0.0148 | 0.0117 | 0.0143 | 0.0146 | 0.0146 | 0.0138 | 0.0157 | 0.0127 | 0.0023 | 0.0038 | 0.0043 | 0.0118 | 0.0122 | 0.0115 | 0.0033 | 0.0033 | 0.0125 | 0.0119 |
| 0.0180 | 0.0193 | 0.0188 | 0.0153 | 0.0193 | 0.0193 | 0.0183 | 0.0188 | 0.0188 | 0.0151 | 0.0203 | 0.0199 | 0.0166 | 0.0155 | 0.0142 | 0.0064 | 0.0106 | 0.0085 | 0.0155 | 0.0155 | 0.0097 | 0.0099 |
| 0.0153 | 0.0168 | 0.0165 | 0.0117 | 0.0162 | 0.0156 | 0.0152 | 0.0157 | 0.0157 | 0.0139 | 0.0183 | 0.0170 | 0.0120 | 0.0105 | 0.0092 | 0.0045 | 0.0089 | 0.0062 | 0.0106 | 0.0106 | 0.0074 | 0.0074 |
| 0.0145 | 0.0174 | 0.0176 | 0.0128 | 0.0169 | 0.0161 | 0.0159 | 0.0165 | 0.0164 | 0.0163 | 0.0175 | 0.0175 | 0.0114 | 0.0105 | 0.0095 | 0.0066 | 0.0106 | 0.0078 | 0.0109 | 0.0109 | 0.0093 | 0.0092 |

Columns 45 through 48

|        |        |        |        |
|--------|--------|--------|--------|
| 0.0395 | 0.0498 | 0.0454 | 0.0446 |
| 0.0411 | 0.0512 | 0.0467 | 0.0459 |

|        |        |        |        |
|--------|--------|--------|--------|
| 0.0353 | 0.0460 | 0.0413 | 0.0405 |
| 0.0385 | 0.0493 | 0.0446 | 0.0438 |
| 0.0387 | 0.0495 | 0.0447 | 0.0439 |
| 0.0412 | 0.0510 | 0.0465 | 0.0459 |
| 0.0403 | 0.0512 | 0.0467 | 0.0459 |
| 0.0354 | 0.0468 | 0.0421 | 0.0413 |
| 0.0365 | 0.0478 | 0.0434 | 0.0427 |
| 0.0402 | 0.0514 | 0.0468 | 0.0461 |
| 0.0376 | 0.0484 | 0.0437 | 0.0428 |
| 0.0403 | 0.0515 | 0.0469 | 0.0461 |
| 0.0393 | 0.0501 | 0.0455 | 0.0446 |
| 0.0344 | 0.0451 | 0.0404 | 0.0399 |
| 0.0312 | 0.0413 | 0.0368 | 0.0357 |
| 0.0343 | 0.0457 | 0.0410 | 0.0401 |
| 0.0213 | 0.0320 | 0.0279 | 0.0270 |
| 0.0094 | 0.0122 | 0.0091 | 0.0091 |
| 0.0106 | 0.0185 | 0.0146 | 0.0148 |
| 0.0089 | 0.0180 | 0.0137 | 0.0132 |
| 0.0121 | 0.0193 | 0.0154 | 0.0151 |
| 0.0109 | 0.0093 | 0.0080 | 0.0090 |
| 0.0112 | 0.0180 | 0.0153 | 0.0145 |
| 0.0147 | 0.0193 | 0.0168 | 0.0174 |
| 0.0150 | 0.0188 | 0.0165 | 0.0176 |
| 0.0087 | 0.0153 | 0.0117 | 0.0128 |
| 0.0148 | 0.0193 | 0.0162 | 0.0169 |
| 0.0117 | 0.0193 | 0.0156 | 0.0161 |

|        |        |        |        |
|--------|--------|--------|--------|
| 0.0143 | 0.0183 | 0.0152 | 0.0159 |
| 0.0146 | 0.0188 | 0.0157 | 0.0165 |
| 0.0146 | 0.0188 | 0.0157 | 0.0164 |
| 0.0138 | 0.0151 | 0.0139 | 0.0163 |
| 0.0157 | 0.0203 | 0.0183 | 0.0175 |
| 0.0127 | 0.0199 | 0.0170 | 0.0175 |
| 0.0023 | 0.0166 | 0.0120 | 0.0114 |
| 0.0038 | 0.0155 | 0.0105 | 0.0105 |
| 0.0043 | 0.0142 | 0.0092 | 0.0095 |
| 0.0118 | 0.0064 | 0.0045 | 0.0066 |
| 0.0122 | 0.0106 | 0.0089 | 0.0106 |
| 0.0115 | 0.0085 | 0.0062 | 0.0078 |
| 0.0033 | 0.0155 | 0.0106 | 0.0109 |
| 0.0033 | 0.0155 | 0.0106 | 0.0109 |
| 0.0125 | 0.0097 | 0.0074 | 0.0093 |
| 0.0119 | 0.0099 | 0.0074 | 0.0092 |
| 0      | 0.0148 | 0.0103 | 0.0100 |
| 0.0148 | 0      | 0.0055 | 0.0081 |
| 0.0103 | 0.0055 | 0      | 0.0053 |
| 0.0100 | 0.0081 | 0.0053 | 0      |



Table 9 The similarity/dissimilarity matrix of 18 eutherian mammals

[illegible]
